# Supplementary material for: H/ACA snoRNAs and snoRNPs Dysregulation Links rRNA Modification to Glioblastoma Progression
Source: Research Square preprint supplement (doi:10.21203/rs.3.rs-8079210/v1), 2025-12-11
Supplement: Supplementary file 1 [file 1519ba53a765a9087bf6721c.xlsx]

## Sheet: Table S6
Table S6. List of splicing alterations observed in U251 cells after partial DKC1 knockdown. A5/A3: Alternative 5'/3' Splice Sites, MX: Mutually Exclusive Exons, RI: Retained Intron, SE: Skipping Exon
gene.id	gene.symbol	gene.type	event.type	event.coord	dPSI	FDR
ENSG00000050393.11	MCUR1	protein_coding	A3	chr6:13790864-13791878:13788704-13791878:-	0.102371	0.048951
ENSG00000108654.16	DDX5	protein_coding	A3	chr17:64504842-64506076:64504318-64506076:-	0.181599	0.02664
ENSG00000113621.15	TXNDC15	protein_coding	A3	chr5:134874530-134887695:134874530-134887701:+	0.151178	0.047952
ENSG00000124193.16	SRSF6	protein_coding	A3	chr20:43460598-43460703:43460598-43463344:+	0.1007	0.0199087
ENSG00000128989.11	ARPP19	protein_coding	A3	chr15:52568902-52569116:52568900-52569116:-	0.148807	0.0194805
ENSG00000137337.15	MDC1	protein_coding	A3	chr6:30711504-30711667:30711501-30711667:-	0.113209	0.0499501
ENSG00000140319.11	SRP14	protein_coding	A3	chr15:40038948-40039093:40038394-40039093:-	0.647736	0.0404595
ENSG00000141756.19	FKBP10	protein_coding	A3	chr17:41812739-41813030:41812739-41813193:+	0.584964	0.03996
ENSG00000144713.13	RPL32	protein_coding	A3	chr3:12840353-12841494:12840341-12841494:-	0.116575	0.00599401
ENSG00000155016.18	CYP2U1	protein_coding	A3	chr4:107932133-107935595:107932133-107936517:+	0.779782	0.0144855
ENSG00000160305.18	DIP2A	protein_coding	A3	chr21:46509376-46511417:46509376-46511429:+	0.126252	0.0344655
ENSG00000166012.17	TAF1D	protein_coding	A3	chr11:93733419-93734625:93733397-93734625:-	0.19496	0.00649351
ENSG00000227868.6	TEX46	protein_coding	A3	chr1:23011200-23013883:23011101-23013883:-	0.683645	0.035964
ENSG00000231742.6	LINC01273	lncRNA	A3	chr20:50172330-50172923:50172330-50172927:+	1	0
ENSG00000240204.3	SMKR1	protein_coding	A3	chr7:129502827-129512247:129502827-129512251:+	0.157535	0.044955
ENSG00000282508.2	LINC01002	lncRNA	A3	chr19:211885-221141:211715-221141:-	0.646976	0.020979
ENSG00000050130.18	JKAMP	protein_coding	A3	chr14:59484593-59486681:59484593-59486731:+	-0.121978	0.043956
ENSG00000071189.21	SNX13	protein_coding	A3	chr7:17891635-17893332:17891628-17893332:-	-0.107669	0.0314685
ENSG00000072042.13	RDH11	protein_coding	A3	chr14:67693052-67695630:67692593-67695630:-	-0.266704	0.0412088
ENSG00000089597.18	GANAB	protein_coding	A3	chr11:62640069-62646562:62640066-62646562:-	-0.395759	0.020979
ENSG00000101343.15	CRNKL1	protein_coding	A3	chr20:20037571-20038349:20037534-20038349:-	-0.107375	0.018981
ENSG00000111142.14	METAP2	protein_coding	A3	chr12:95474330-95476071:95474330-95476143:+	-0.145638	0.00499501
ENSG00000111142.14	METAP2	protein_coding	A3	chr12:95474330-95476074:95474330-95476143:+	-0.105987	0.00499501
ENSG00000131408.15	NR1H2	protein_coding	A3	chr19:50378796-50379092:50378796-50379134:+	-0.183394	0.00899101
ENSG00000144228.9	SPOPL	protein_coding	A3	chr2:138550604-138550903:138550604-138550974:+	-0.118968	0.024975
ENSG00000160181.9	TFF2	protein_coding	A3	chr21:42350030-42350879:42349993-42350879:-	-0.666642	0.0314685
ENSG00000161939.19	RNASEK-C17orf49	protein_coding	A3	chr17:7017014-7017257:7017014-7017261:+	-0.423407	0.0457875
ENSG00000165898.14	ISCA2	protein_coding	A3	chr14:74494152-74494275:74494152-74494826:+	-0.182742	0.020979
ENSG00000166012.17	TAF1D	protein_coding	A3	chr11:93733505-93734625:93733419-93734625:-	-0.127407	0.0292208
ENSG00000176018.13	LYSMD3	protein_coding	A3	chr5:90519484-90525035:90519425-90525035:-	-0.116027	0.034965
ENSG00000176142.13	TMEM39A	protein_coding	A3	chr3:119458240-119461962:119458083-119461962:-	-0.149159	0.017982
ENSG00000176142.13	TMEM39A	protein_coding	A3	chr3:119458184-119461962:119458083-119461962:-	-0.332338	0.0374625
ENSG00000206503.13	HLA-A	protein_coding	A3	chr6:29944397-29944500:29944397-29945059:+	-0.164062	0.0124875
ENSG00000214855.9	APOC1P1	transcribed_unprocessed_pseudogene	A3	chr19:44927033-44927610:44927033-44927795:+	-0.666667	0.0394605
ENSG00000267523.1	AC008735.2	lncRNA	A3	chr19:55662394-55674649:55662382-55674649:-	-0.156232	0.037962
ENSG00000268686.2	AC010643.1	lncRNA	A3	chr19:49371143-49382851:49371116-49382851:-	-0.66603	0.0474525
ENSG00000092295.12	TGM1	protein_coding	A5	chr14:24262354-24263934:24262354-24263994:-	0.666667	0.045954
ENSG00000108984.15	MAP2K6	protein_coding	A5	chr17:69502685-69505780:69502684-69505780:+	0.636572	0.026973
ENSG00000116288.13	PARK7	protein_coding	A5	chr1:7962101-7962763:7962081-7962763:+	0.163234	0.0474525
ENSG00000128040.11	SPINK2	protein_coding	A5	chr4:56820579-56821458:56820579-56821608:-	0.853906	0.02997
ENSG00000143553.11	SNAPIN	protein_coding	A5	chr1:153659184-153659448:153658886-153659448:+	0.154846	0.0384615
ENSG00000161939.19	RNASEK-C17orf49	protein_coding	A5	chr17:7014878-7015062:7014277-7015062:+	0.534098	0.0457875
ENSG00000165175.16	MID1IP1	protein_coding	A5	chrX:38804413-38804683:38801487-38804683:+	0.219339	0.00999001
ENSG00000176358.15	TAC4	protein_coding	A5	chr17:49844157-49847895:49844157-49847913:-	0.426201	0.0284715
ENSG00000187514.17	PTMA	protein_coding	A5	chr2:231710676-231711348:231710584-231711348:+	0.129741	0.035964
ENSG00000266402.3	SNHG25	lncRNA	A5	chr17:64146000-64146230:64145995-64146230:+	0.194828	0.000499501
ENSG00000268790.5	AC008764.4	protein_coding	A5	chr19:16578409-16647096:16578409-16647120:-	0.627887	0.0044955
ENSG00000089009.15	RPL6	protein_coding	A5	chr12:112408656-112409041:112408656-112409203:-	-0.188643	0.041958
ENSG00000149554.13	CHEK1	protein_coding	A5	chr11:125626034-125626749:125626029-125626749:+	-0.301991	0.0324675
ENSG00000163993.7	S100P	protein_coding	A5	chr4:6694070-6696893:6693912-6696893:+	-0.531339	0.030969
ENSG00000164951.16	PDP1	protein_coding	A5	chr8:93917218-93917911:93917079-93917911:+	-0.146279	0.034965
ENSG00000177600.9	RPLP2	protein_coding	A5	chr11:810357-811597:810048-811597:+	-0.105749	0.023976
ENSG00000189143.9	CLDN4	protein_coding	A5	chr7:73827973-73828600:73827821-73828600:+	-0.907658	0.044955
ENSG00000230337.1	EXOSC10-AS1	lncRNA	A5	chr1:11099910-11101801:11099814-11101801:+	-0.389859	0.017982
ENSG00000233024.7	NPIPA9	protein_coding	A5	chr16:18368386-18372578:18368386-18372723:-	-0.26763	0.024975
ENSG00000258818.4	RNASE4	protein_coding	A5	chr14:20684758-20699355:20684696-20699355:+	-0.460112	0.031968
ENSG00000023191.17	RNH1	protein_coding	MX	chr11:499031:499185-499829:499501:499600-499829:-	0.937676	0.031968
ENSG00000072849.11	DERL2	protein_coding	MX	chr17:5480144-5480387:5480582-5481296:5480144-5481101:5481142-5481296:-	0.288895	0.0158175
ENSG00000105993.15	DNAJB6	protein_coding	MX	chr7:157367483-157368737:157368795:157367483-157382246:157382336:+	0.292641	0.043956
ENSG00000105993.15	DNAJB6	protein_coding	MX	chr7:157367483-157368737:157368795:157367483-157382246:157382275:+	0.275985	0.043956
ENSG00000120942.14	UBIAD1	protein_coding	MX	chr1:11274060-11285644:11288434:11274060-11294873:11295164:+	0.153945	0.025974
ENSG00000120992.18	LYPLA1	protein_coding	MX	chr8:54055133-54062254:54062324-54065748:54055133-54063328:54063375-54065748:-	0.340063	0.047619
ENSG00000124193.16	SRSF6	protein_coding	MX	chr20:43460598-43460703:43461334:43460598-43463344:43463605:+	0.109884	0.0157343
ENSG00000143401.15	ANP32E	protein_coding	MX	chr1:150229237-150230571:150230693-150235733:150229237-150231777:150231926-150235733:-	0.255356	0.01998
ENSG00000143756.12	FBXO28	protein_coding	MX	chr1:224130581-224134074:224134212-224157352:224130581-224153142:224153337-224157352:+	0.154406	0.0442058
ENSG00000159140.21	SON	protein_coding	MX	chr21:33559775-33559877:33560667:33559775-33567157:33567467:+	0.157141	0.025974
ENSG00000164919.11	COX6C	protein_coding	MX	chr8:99878148:99878265-99887490:99885992:99886382-99887490:-	0.305329	0.011988
ENSG00000177565.18	TBL1XR1	protein_coding	MX	chr3:177032318:177032340-177032971:177032606:177032659-177032971:-	0.350343	0.032967
ENSG00000177565.18	TBL1XR1	protein_coding	MX	chr3:177025345:177025524-177026373:177025985:177026041-177026373:-	0.443253	0.032967
ENSG00000205572.10	SERF1B	protein_coding	MX	chr5:70026515-70032315:70032493:70026515-70041524:70043113:+	0.19809	0.0314685
ENSG00000205572.10	SERF1B	protein_coding	MX	chr5:70026515-70029766:70030122:70026515-70032315:70032696:+	0.318791	0.017982
ENSG00000205581.11	HMGN1	protein_coding	MX	chr21:39345274-39347247:39347292-39348292:39345274-39347379:39347483-39348292:-	0.18885	0
ENSG00000213563.7	C8orf82	protein_coding	MX	chr8:144526219:144528072-144528761:144528373:144528471-144528761:-	0.15845	0.043956
ENSG00000229502.5	AL391863.1	lncRNA	MX	chr6:157872571:157872977-157874694:157874110:157874385-157874694:-	0.856683	0.026973
ENSG00000236200.6	KDM4A-AS1	lncRNA	MX	chr1:43685123:43685347-43702656:43699923:43700063-43702656:-	0.277521	0.041958
ENSG00000264914.1	AC015845.1	lncRNA	MX	chr17:57912481-57915016:57915139:57912481-57922396:57922581:+	0.291699	0.0444555
ENSG00000274523.5	RCC1L	protein_coding	MX	chr7:75027122:75028079-75052711:75042974:75043109-75052711:-	0.344224	0.017982
ENSG00000060718.22	COL11A1	protein_coding	MX	chr1:103001079:103001201-103001925:103001260:103001631-103001925:-	-0.135604	0.00674326
ENSG00000085063.17	CD59	protein_coding	MX	chr11:33710343-33711384:33711505-33717370:33710343-33716826:33716868-33717370:-	-0.20169	0.026973
ENSG00000104915.15	STX10	protein_coding	MX	chr19:13144062:13144139-13144577:13144271:13144403-13144577:-	-0.175489	0.0431235
ENSG00000108654.16	DDX5	protein_coding	MX	chr17:64504116-64504222:64504318-64506076:64504116-64504677:64504842-64506076:-	-0.36912	0
ENSG00000112695.11	COX7A2	protein_coding	MX	chr6:75237988-75240301:75240385-75243717:75237988-75241176:75241265-75243717:-	-0.414742	0.00899101
ENSG00000116005.12	PCYOX1	protein_coding	MX	chr2:70275666-70276734:70276787:70275666-70277020:70279103:+	-0.643574	0.031968
ENSG00000118785.14	SPP1	protein_coding	MX	chr4:87980126-87980393:87980688:87980126-87981475:87981761:+	-0.248381	0.0302198
ENSG00000119718.11	EIF2B2	protein_coding	MX	chr14:75006714-75007061:75007416:75006714-75007722:75007735:+	-0.446522	0.0474525
ENSG00000120992.18	LYPLA1	protein_coding	MX	chr8:54062324-54063328:54063375-54100908:54062324-54065748:54065813-54100908:-	-0.295306	0.047619
ENSG00000124193.16	SRSF6	protein_coding	MX	chr20:43460598-43460703:43461334:43460598-43465855:43466046:+	-0.1056	0.014985
ENSG00000124193.16	SRSF6	protein_coding	MX	chr20:43460598-43463344:43463605:43460598-43465855:43466046:+	-0.244946	0.0044955
ENSG00000124193.16	SRSF6	protein_coding	MX	chr20:43460598-43460703:43464243:43460598-43465855:43466046:+	-0.105173	0.014985
ENSG00000131368.8	MRPS25	protein_coding	MX	chr3:15049881:15049935-15053291:15052435:15052633-15053291:-	-0.218267	0.0034965
ENSG00000143401.15	ANP32E	protein_coding	MX	chr1:150226795-150229072:150229237-150231777:150226795-150230571:150230693-150231777:-	-0.12236	0.0499501
ENSG00000143443.10	C1orf56	protein_coding	MX	chr1:151048852-151049581:151049713:151048852-151050438:151051420:+	-0.17168	0.0234765
ENSG00000150753.12	CCT5	protein_coding	MX	chr5:10250445-10254145:10254584:10250445-10258111:10258140:+	-0.495071	0.034965
ENSG00000163319.11	MRPS18C	protein_coding	MX	chr4:83456958-83458346:83458429-83460973:83456958-83459740:83459797-83460973:+	-0.115952	0.00899101
ENSG00000166313.19	APBB1	protein_coding	MX	chr11:6395125:6395279-6395786:6395468:6395701-6395786:-	-1	0
ENSG00000168522.13	FNTA	protein_coding	MX	chr8:43069659-43070102:43070353:43069659-43077216:43077272:+	-0.373446	0.017982
ENSG00000176142.13	TMEM39A	protein_coding	MX	chr3:119437934:119438103-119458018:119452509:119452530-119458018:-	-0.347304	0.0314685
ENSG00000182534.13	MXRA7	protein_coding	MX	chr17:76672551:76677702-76685072:76680534:76680879-76685072:-	-0.10538	0.024975
ENSG00000183010.17	PYCR1	protein_coding	MX	chr17:81932384:81933376-81934653:81934364:81934489-81934653:-	-0.310483	0
ENSG00000185305.11	ARL15	protein_coding	MX	chr5:53883942:53886713-54113202:53887365:53887383-54113202:-	-0.254613	0.0314685
ENSG00000198363.18	ASPH	protein_coding	MX	chr8:61625306:61626280-61633683:61633125:61633376-61633683:-	-0.473471	0.021978
ENSG00000198898.14	CAPZA2	protein_coding	MX	chr7:116904383-116906263:116906736:116904383-116910213:116910294:+	-0.47532	0.017982
ENSG00000205572.10	SERF1B	protein_coding	MX	chr5:70026515-70032315:70032696:70026515-70041524:70043113:+	-0.212466	0.02997
ENSG00000205572.10	SERF1B	protein_coding	MX	chr5:70026515-70032315:70032696:70026515-70041524:70042008:+	-0.313615	0.017982
ENSG00000205581.11	HMGN1	protein_coding	MX	chr21:39345274-39345830:39345958-39348292:39345274-39347247:39347292-39348292:-	-0.135428	0.03996
ENSG00000206053.13	JPT2	protein_coding	MX	chr16:1678356-1685439:1685587-1697812:1678356-1691843:1691985-1697812:+	-0.20119	0.0134865
ENSG00000213585.11	VDAC1	protein_coding	MX	chr5:133980729:133980956-133990855:133988788:133989243-133990855:-	-0.301281	0.0484515
ENSG00000232613.6	LINC02576	lncRNA	MX	chr2:65031259-65037403:65037497:65031259-65052380:65053017:+	-0.837563	0.0224775
ENSG00000243279.4	PRAF2	protein_coding	MX	chrX:49071597:49072008-49073809:49072031:49072650-49073809:-	-0.310963	0.028971
ENSG00000250846.6	EPHA5-AS1	lncRNA	MX	chr4:65670673-65693109:65693386:65670673-65697949:65698029:+	-0.350159	0.0254745
ENSG00000257126.6	FOXG1-AS1	lncRNA	MX	chr14:28729510:28729556-28738727:28735003:28735030-28738727:-	-0.382027	0.036963
ENSG00000268266.1	AC003005.2	lncRNA	MX	chr19:57478086-57481881:57482005:57478086-57482896:57482996:+	-0.625842	0.037962
ENSG00000276997.4	AL513314.2	lncRNA	MX	chr1:222486060:222486121-222504366:222501338:222501533-222504366:-	-0.36703	0.044955
ENSG00000278932.4	CR381653.1	lncRNA	MX	chr21:9325100-9325631:9325823-9327240:9325100-9325874:9325961-9327240:+	-0.186623	0.0499501
ENSG00000282508.2	LINC01002	lncRNA	MX	chr19:211252:211715-221141:214324:214451-221141:-	-0.658384	0
ENSG00000104915.15	STX10	protein_coding	RI	chr19:13144062:13144139-13144577:13144671:-	0.155325	0.0431235
ENSG00000127824.14	TUBA4A	protein_coding	RI	chr2:219251194:219251323-219251565:219251713:-	0.125818	0.047952
ENSG00000161939.19	RNASEK-C17orf49	protein_coding	RI	chr17:7014145:7014277-7015062:7015156:+	0.495325	0.0457875
ENSG00000161960.16	EIF4A1	protein_coding	RI	chr17:7577827:7577916-7578227:7578244:+	0.144854	0.038961
ENSG00000198830.11	HMGN2	protein_coding	RI	chr1:26473483:26473585-26473703:26473732:+	0.147292	0
ENSG00000060718.22	COL11A1	protein_coding	RI	chr1:103001260:103001631-103001925:103001969:-	-0.156843	0.00674326
ENSG00000115053.17	NCL	protein_coding	RI	chr2:231457001:231457124-231459001:231459125:-	-0.373909	0.0274725
ENSG00000126903.16	SLC10A3	protein_coding	RI	chrX:154487306:154488496-154488584:154489082:-	-0.295905	0.00499501
ENSG00000072042.13	RDH11	protein_coding	SE	chr14:67692593-67692973:67693052-67695630:-	0.121088	0.0412088
ENSG00000099256.19	PRTFDC1	protein_coding	SE	chr10:24849891-24851388:24851464-24855318:-	0.18258	0.01998
ENSG00000099715.14	PCDH11Y	protein_coding	SE	chrY:5000605-5030899:5031067-5031906:+	1	0
ENSG00000100934.15	SEC23A	protein_coding	SE	chr14:39091713-39092541:39092627-39093187:-	0.124145	0
ENSG00000101247.18	NDUFAF5	protein_coding	SE	chr20:13798500-13801486:13801683-13808842:+	0.130113	0.0494505
ENSG00000101247.18	NDUFAF5	protein_coding	SE	chr20:13798500-13801508:13801683-13808842:+	0.310207	0.0494505
ENSG00000110917.8	MLEC	protein_coding	SE	chr12:120694269-120694824:120695000-120696316:+	0.222959	0.045954
ENSG00000112706.12	IMPG1	protein_coding	SE	chr6:76034787-76041893:76042126-76072422:-	0.678022	0.040959
ENSG00000128989.11	ARPP19	protein_coding	SE	chr15:52557222-52568848:52568900-52569116:-	0.149601	0.0194805
ENSG00000131969.15	ABHD12B	protein_coding	SE	chr14:50872278-50878745:50878847-50880452:+	0.647775	0.01998
ENSG00000142166.13	IFNAR1	protein_coding	SE	chr21:33341174-33343535:33343676-33345246:+	0.32109	0.017982
ENSG00000143756.12	FBXO28	protein_coding	SE	chr1:224134212-224153142:224153337-224157352:+	0.100875	0.0442058
ENSG00000149554.13	CHEK1	protein_coding	SE	chr11:125626029-125626417:125626575-125626749:+	0.272546	0.0324675
ENSG00000156273.16	BACH1	protein_coding	SE	chr21:29329693-29582312:29582351-29597570:+	0.451352	0.0424575
ENSG00000158578.21	ALAS2	protein_coding	SE	chrX:55026015-55027751:55027857-55030942:-	0.818619	0.0274725
ENSG00000163607.17	GTPBP8	protein_coding	SE	chr3:112991335-112993026:112993124-112996892:+	0.280165	0.041958
ENSG00000164741.15	DLC1	protein_coding	SE	chr8:13100770-13102790:13102853-13110742:-	0.243653	0.0244755
ENSG00000165821.12	SALL2	protein_coding	SE	chr14:21522244-21522833:21524931-21525337:-	0.668206	0.048951
ENSG00000165898.14	ISCA2	protein_coding	SE	chr14:74494152-74494275:74494390-74494826:+	0.143409	0.020979
ENSG00000168522.13	FNTA	protein_coding	SE	chr8:43069659-43072181:43072307-43077216:+	0.116577	0.017982
ENSG00000170734.12	POLH	protein_coding	SE	chr6:43576440-43582316:43582456-43583007:+	0.134941	0.02997
ENSG00000170854.18	RIOX2	protein_coding	SE	chr3:97950888-97952152:97952252-97954392:-	0.107107	0.0464535
ENSG00000181061.14	HIGD1A	protein_coding	SE	chr3:42786162-42794157:42794299-42804436:-	0.1071	0.00599401
ENSG00000188428.20	BLOC1S5	protein_coding	SE	chr6:8026425-8041139:8041268-8062534:-	0.203293	0.023976
ENSG00000189410.12	SH2D5	protein_coding	SE	chr1:20727603-20727958:20728086-20732181:-	0.463908	0.046953
ENSG00000196843.17	ARID5A	protein_coding	SE	chr2:96547517-96549321:96549459-96549753:+	0.105952	0.037962
ENSG00000197694.18	SPTAN1	protein_coding	SE	chr9:128591625-128592983:128593042-128594175:+	0.1057	0
ENSG00000224383.8	PRR29	protein_coding	SE	chr17:63999074-64001084:64001310-64001467:+	0.852823	0.0324675
ENSG00000286615.1	AC011416.4	lncRNA	SE	chr5:127233529-127264502:127264718-127282213:-	0.780181	0.042957
ENSG00000011451.21	WIZ	protein_coding	SE	chr19:15427533-15428110:15428508-15429586:-	-0.13858	0.0174825
ENSG00000072849.11	DERL2	protein_coding	SE	chr17:5480144-5480387:5480543-5481101:-	-0.181942	0.00949051
ENSG00000072849.11	DERL2	protein_coding	SE	chr17:5480144-5480387:5480459-5481101:-	-0.398914	0.0158175
ENSG00000080824.19	HSP90AA1	protein_coding	SE	chr14:102085431-102085965:102086124-102086217:-	-0.153815	0.0124875
ENSG00000092203.15	TOX4	protein_coding	SE	chr14:21477284-21477496:21477592-21487451:+	-0.223195	0.0499501
ENSG00000102245.8	CD40LG	protein_coding	SE	chrX:136654430-136656356:136656418-136659039:+	-0.666667	0.0444555
ENSG00000106266.11	SNX8	protein_coding	SE	chr7:2278305-2337116:2337281-2354222:-	-0.319704	0.002997
ENSG00000108654.16	DDX5	protein_coding	SE	chr17:64504318-64504677:64504880-64506076:-	-0.382438	0.00799201
ENSG00000120942.14	UBIAD1	protein_coding	SE	chr1:11274060-11285644:11285732-11294873:+	-0.321817	0.025974
ENSG00000124193.16	SRSF6	protein_coding	SE	chr20:43460598-43460703:43460852-43463344:+	-0.238511	0.0157343
ENSG00000126432.14	PRDX5	protein_coding	SE	chr11:64318386-64319734:64319868-64320865:+	-0.138885	0.016983
ENSG00000131969.15	ABHD12B	protein_coding	SE	chr14:50872278-50877952:50878079-50878745:+	-0.83076	0.01998
ENSG00000135316.19	SYNCRIP	protein_coding	SE	chr6:85624112-85636967:85637143-85640221:-	-0.121236	0.0314685
ENSG00000138081.21	FBXO11	protein_coding	SE	chr2:47839769-47865792:47865892-47888626:-	-0.396545	0.0494505
ENSG00000138100.14	TRIM54	protein_coding	SE	chr2:27299416-27299530:27299655-27304959:+	-0.666667	0.0374625
ENSG00000149679.11	CABLES2	protein_coding	SE	chr20:62393605-62394157:62394265-62394937:-	-0.116777	0.0254745
ENSG00000153827.14	TRIP12	protein_coding	SE	chr2:229880128-229908965:229909086-229921271:-	-0.144462	0.034965
ENSG00000157349.17	DDX19B	protein_coding	SE	chr16:70299354-70314902:70314955-70315969:+	-0.21551	0.02997
ENSG00000160305.18	DIP2A	protein_coding	SE	chr21:46558393-46559834:46559863-46560722:+	-0.165233	0.0344655
ENSG00000162398.11	LEXM	protein_coding	SE	chr1:54817122-54841616:54841702-54841801:+	-1	0
ENSG00000163319.11	MRPS18C	protein_coding	SE	chr4:83458429-83459740:83459797-83460973:+	-0.113036	0.011988
ENSG00000165175.16	MID1IP1	protein_coding	SE	chrX:38801487-38802535:38804413-38804683:+	-0.107915	0.00999001
ENSG00000167779.9	IGFBP6	protein_coding	SE	chr12:53098958-53099267:53099324-53100712:+	-0.278695	0.0164835
ENSG00000172845.17	SP3	protein_coding	SE	chr2:173956232-173963761:173963883-173964405:-	-0.121992	0.018981
ENSG00000175877.4	TMEM270	protein_coding	SE	chr7:73861266-73861469:73861591-73864993:+	-0.229101	0.0499501
ENSG00000186973.11	FAM183A	protein_coding	SE	chr1:43150820-43152828:43152931-43156206:+	-0.597128	0.048951
ENSG00000196503.5	ARL9	protein_coding	SE	chr4:56506141-56511185:56511347-56518678:+	-0.770653	0.0344655
ENSG00000214967.5	NPIPA7	protein_coding	SE	chr16:16392096-16392593:16392662-16393456:+	-0.161651	0.0184815
ENSG00000233024.7	NPIPA9	protein_coding	SE	chr16:18368386-18372723:18372854-18374832:-	-0.224882	0.024975
ENSG00000246223.9	LINC01550	lncRNA	SE	chr14:97959820-97960263:97960417-97969273:-	-1	0
ENSG00000259687.2	LINC01220	lncRNA	SE	chr14:75294541-75294677:75294737-75296120:+	-0.556889	0.0194805
