# Supplementary material for: H/ACA snoRNAs and snoRNPs Dysregulation Links rRNA Modification to Glioblastoma Progression
Source: Research Square preprint supplement (doi:10.21203/rs.3.rs-8079210/v1), 2025-12-11
Supplement: Supplementary file 3 [file 6b38528cc3469be8b82b9647.xlsx]

## Sheet: Table S3
Table S3. Genomic localization of snoRNAs and scaRNAs in the Ampliseq platform and their host genes.
snoRNA	snoRNA coordinates	host genes	host genes coordinates
RNU105B	chr20:8831185-8831393	PLCB1	chr20:8132266-8884900
RNU105C	chr8:54330686-54330895	----	----
SCARNA1	chr1:27834401-27834566	PPP1R8	chr1:27830782-27851676
SCARNA10	chr12:6510222-6510551	NCAPD2	chr12:6494102-6531955
SCARNA11	chr12:6581473-6581609	CHD4	chr12:6570082-6607379
SCARNA12	chr12:6967337-6967606	PHB2	chr12:6965327-6970664
SCARNA13	chr14:95533355-95533629	SNHG10	chr14:95532912-95534872
SCARNA14	chr15:66347206-66347342	TIPIN	chr15:66336191-66356685
SCARNA15	chr15:82755945-82756071	SNHG21	chr15:82750564-82757206
SCARNA16	chr17:77089307-77089493	SNHG20, SEC14L1	chr17:77088643-77094986, chr17:77088685-77217101
SCARNA17	chr18:49814133-49814276	SNHG22	chr18:49814023-49851059
SCARNA18	chr5:83064204-83064337	TMEM167A	chr5:83052846-83077394
SCARNA2	chr1:109100193-109100612	----	----
SCARNA20	chr17:60231516-60231645	USP32	chr17:60177327-60392133
SCARNA21	chr17:7906123-7906260	CHD3	chr17:7888789-7912755
SCARNA22	chr4:1974636-1974760	NSD2	chr4:1871393-1982192
SCARNA23	chrX:24744441-24744570	POLA1	chrX:24693918-24996986
SCARNA27	chr6:8086408-8086533	EEF1E1-BLOC1S5, EEF1E1	chr6:8013567-8102595, chr6:8079395-8102548
SCARNA3	chr1:175968397-175968540	COP1	chr1:175944831-176207286
SCARNA4	chr1:155925958-155926086	KHDC4	chr1:155913045-155934413
SCARNA5	chr2:233275726-233276003	ATG16L1	chr2:233251673-233295669
SCARNA6	chr2:233288676-233288941	ATG16L1	chr2:233251673-233295669
SCARNA7	chr3:160514907-160515236	KPNA4	chr3:160495007-160565571
SCARNA8	chr9:19063656-19063786	HAUS6	chr9:19053141-19102904
SCARNA9	chr11:93721514-93721866	CEP295	chr11:93661682-93730358
SNORA1	chr11:93732004-93732133	TAF1D	chr11:93730194-93741495
SNORA10	chr16:1962334-1962466	RPS2	chr16:1962058-1964826
SNORA11	chrX:54814370-54814500	MAGED2	chrX:54807745-54816015
SNORA11B	chr14:91126426-91126552	DGLUCY	chr14:91114073-91225632
SNORA11C	chrX:47388650-47388776	ZNF157	chrX:47370578-47414498
SNORA11D	chrX:52190622-52190748	MAGED4	chrX:52184888-52192268
SNORA11E	chrX:52063347-52063473	MAGED4B	chrX:52061827-52069183
SNORA12	chr10:100237156-100237302	CWF19L1	chr10:100232298-100267638
SNORA13	chr5:112161485-112161617	EPB41L4A-AS1	chr5:112160526-112162501
SNORA14A	chr7:75943783-75943916	POR	chr7:75915155-75986855
SNORA14B	chr1:235127803-235127937	TOMM20	chr1:235109341-235128837
SNORA15	chr7:56060470-56060602	CCT6A	chr7:56051765-56063989
SNORA16A	chr1:28580920-28581053	SNHG12	chr1:28578538-28582983
SNORA16B	chr1:212352818-212352950	PPP2R5A	chr1:212285410-212361853
SNORA18	chr11:93733466-93733597	TAF1D	chr11:93730194-93741495
SNORA19	chr10:119060011-119060138	EIF3A	chr10:119033670-119080817
SNORA21	chr17:38852863-38852995	RPL23	chr17:38847860-38853721
SNORA22	chr7:65755526-65755659	CCT6P1	chr7:65751105-65763675
SNORA23	chr11:9428766-9428954	IPO7	chr11:9384652-9448127
SNORA24	chr4:118279190-118279320	SNHG8	chr4:118278762-118279823
SNORA25	chr11:93730513-93730646	TAF1D	chr11:93730194-93741495
SNORA27	chr13:27255401-27255526	RPL21	chr13:27251558-27256568
SNORA28	chr14:103337849-103337974	EIF5	chr14:103334237-103345025
SNORA29	chr6:159785594-159785733	TCP1	chr6:159778498-159789602
SNORA2A	chr12:48656648-48656782	KANSL2	chr12:48653211-48682238
SNORA2B	chr12:48667457-48667593	KANSL2	chr12:48653211-48682238
SNORA30	chr16:30710537-30710665	SRCAP	chr16:30699171-30741409
SNORA31	chr13:45337480-45337609	TPT1	chr13:45333471-45341183
SNORA33	chr6:132817219-132817351	RPS12	chr6:132814569-132817564
SNORA35	chrX:114630797-114630924	HTR2C	chrX:114584086-114910061
SNORA36A	chrX:154768528-154768659	DKC1	chrX:154762864-154777689
SNORA36C	chr2:69520044-69520171	AAK1	chr2:69457997-69643739
SNORA37	chr18:54222284-54222412	MBD2	chr18:54151606-54224669
SNORA38	chr6:31623079-31623210	PRRC2A	chr6:31620715-31637771
SNORA38B	chr17:67740670-67740801	NOL11	chr17:67717936-67744531
SNORA4	chr3:186787613-186787749	EIF4A2	chr3:186783577-186789897
SNORA40	chr11:93735110-93735236	TAF1D	chr11:93730194-93741495
SNORA41	chr2:206162228-206162359	EEF1B2	chr2:206159895-206162928
SNORA44	chr1:28580381-28580512	SNHG12	chr1:28578538-28582983
SNORA46	chr16:58548499-58548633	CNOT1	chr16:58519951-58629826
SNORA47	chr5:77080434-77080571	ZBED3	chr5:77072072-77087285
SNORA48	chr17:7574713-7574847	EIF4A1, SENP3-EIF4A1	chr17:7572825-7579006, chr17:7561992-7579006
SNORA49	chr12:132031224-132031360	EP400	chr12:131949942-132080460
SNORA51	chr20:2655067-2655198	NOP56	chr20:2652632-2658393
SNORA52	chr11:811681-811814	RPLP2	chr11:809967-812876
SNORA53	chr12:98599635-98599884	SLC25A3	chr12:98593686-98606367
SNORA55	chr1:39567374-39567510	PABPC4	chr1:39560816-39576790
SNORA56	chrX:154774998-154775126	DKC1	chrX:154762864-154777689
SNORA57	chr11:62665422-62665570	CSKMT	chr11:62665312-62668108
SNORA58	chr3:131479097-131479233	MRPL3	chr3:131462212-131502971
SNORA59A	chr1:12507246-12507397	VPS13D	chr1:12230030-12512047
SNORA59B	chr17:19557560-19557711	SLC47A1	chr17:19533854-19579034
SNORA5A	chr7:45104349-45104482	TBRG4	chr7:45100100-45111697
SNORA5B	chr7:45105968-45106099	TBRG4	chr7:45100100-45111697
SNORA5C	chr7:45104906-45105042	TBRG4	chr7:45100100-45111697
SNORA6	chr3:39408391-39408539	RPSA	chr3:39406720-39412542
SNORA60	chr20:38449369-38449504	SNHG11	chr20:38446654-38450921
SNORA61	chr1:28579764-28579893	SNHG12	chr1:28578538-28582983
SNORA62	chr3:39411054-39411207	RPSA	chr3:39406720-39412542
SNORA63	chr3:186787299-186787433	EIF4A2	chr3:186783577-186789897
SNORA64	chr16:1962973-1963106	RPS2	chr16:1962058-1964826
SNORA65	chr9:127448502-127448637	RPL12	chr9:127447674-127451406
SNORA66	chr1:92840719-92840851	RPL5	chr1:92832040-92841924
SNORA67	chr17:7577955-7578091	EIF4A1, SENP3-EIF4A1	chr17:7572825-7579006, chr17:7561992-7579006
SNORA68	chr19:17862588-17862720	RPL18A	chr19:17859910-17863319
SNORA69	chrX:119787353-119787484	RPL39	chrX:119786504-119791630
SNORA70	chrX:154400281-154400415	RPL10	chrX:154398377-154402332
SNORA70B	chr2:61417244-61417377	USP34	chr2:61187463-61471087
SNORA70C	chr9:117181066-117181201	ASTN2	chr9:116423112-117415057
SNORA70D	chr16:71698567-71698701	PHLPP2	chr16:71644924-71724701
SNORA70E	chr11:83041464-83041598	RAB30	chr11:82973133-83071897
SNORA70F	chr2:164687643-164687777	COBLL1	chr2:164680188-164841823
SNORA70G	chr12:68627234-68627375	----	----
SNORA71A	chr20:38427306-38427443	SNHG17	chr20:38420588-38435377
SNORA71B	chr20:38425195-38425330	SNHG17	chr20:38420588-38435377
SNORA71C	chr20:38429667-38429804	SNHG17	chr20:38420588-38435377
SNORA71D	chr20:38433862-38433999	SNHG17	chr20:38420588-38435377
SNORA72	chr8:98042086-98042217	RPL30	chr8:98041721-98045545
SNORA73A	chr1:28507365-28507571	SNHG3, RCC1	chr1:28505943-28510892, chr1:28506043-28538989
SNORA74A	chr5:139278780-139278979	SNHG4, MATR3	chr5:139273752-139283184, chr5:139274101-139331677
SNORA74B	chr5:173020726-173020929	ATP6V0E1	chr5:172983771-173035445
SNORA75	chr2:231455800-231455936	NCL	chr2:231453531-231464484
SNORA77	chr1:203729581-203729705	ATP2B4	chr1:203626832-203744081
SNORA78	chr16:1965184-1965310	SNHG9	chr16:1964996-1965504
SNORA79	chr14:81202695-81202834	GTF2A1	chr14:81175452-81220959
SNORA7A	chr3:12840312-12840450	RPL32	chr3:12834485-12841565
SNORA7B	chr3:129397210-129397348	RPL32P3	chr3:129382834-129399439
SNORA8	chr11:93732361-93732499	TAF1D	chr11:93730194-93741495
SNORA80B	chr2:10446714-10446849	ODC1	chr2:10439968-10448327
SNORA81	chr3:186786676-186786852	EIF4A2	chr3:186783577-186789897
SNORA84	chr9:92292461-92292593	IARS1	chr9:92210207-92293697
SNORA9	chr7:44985378-44985510	SNHG15	chr7:44983023-44986696
SNORD10	chr17:7576811-7576958	EIF4A1, SENP3-EIF4A1	chr17:7572825-7579006, chr17:7561992-7579006
SNORD118	chr17:8173452-8173588	TMEM107	chr17:8172457-8176380
SNORD15A	chr11:75400391-75400538	RPS3	chr11:75399518-75406907
SNORD15B	chr11:75404421-75404566	RPS3	chr11:75399518-75406907
SNORD17	chr20:17962710-17962946	SNX5	chr20:17941600-17968794
SNORD22	chr11:62852910-62853035	SNHG1	chr11:62851978-62855885
SNORD3A	chr17:19188016-19188232	----	----
SNORD3C	chr17:19190029-19190245	----	----
SNORD94	chr2:86135870-86136006	PTCD3	chr2:86106235-86142157
SNORD97	chr11:10801467-10801608	EIF4G2	chr11:10797054-10808926
