# Supplementary material for: H/ACA snoRNAs and snoRNPs Dysregulation Links rRNA Modification to Glioblastoma Progression
Source: Research Square preprint supplement (doi:10.21203/rs.3.rs-8079210/v1), 2025-12-11
Supplement: Supplementary file 4 [file 7f6bab0e2ed07f159be7cbff.xlsx]

## Sheet: Table S5
Table S5. List of snoRNA/scaRNAs whose expression was reduced after partial DKC1 knockdown in U251 cells.
Down-regulated
snoRNA	log2FC	FDR
SNORA64	-2.10352	7.70441e-40
SNORA24	-1.2223	5.22951e-06
SNORA5A	-1.22006	7.86868e-10
SCARNA22	-1.15154	6.75916e-12
SNORA67	-1.14666	1.27488e-06
SNORA21	-1.13717	6.62508e-13
SNORA68	-1.0966	1.70911e-07
SNORA38	-1.08579	9.63312e-06
SNORA22	-1.08393	4.80726e-09
SNORA23	-1.0047	8.47885e-10
SNORA27	-0.992076	7.15215e-09
SNORA73A	-0.990586	3.90574e-06
SNORA52	-0.949625	7.3392e-09
SNORA71A	-0.905011	0.00159172
SNORA2A	-0.888234	8.68528e-08
SNORA28	-0.832574	3.66268e-06
SNORA71D	-0.823413	4.74361e-06
SNORA49	-0.812634	6.11755e-07
SCARNA4	-0.785355	4.92106e-11
SCARNA18	-0.74926	0.0231259
SCARNA11	-0.734148	0.00149949
SNORA63	-0.697296	0.000101817
SNORA7B	-0.676511	5.79586e-09
SCARNA13	-0.673	0.000338441
SNORA31	-0.643756	0.000120838
SNORA70	-0.637876	0.00433233
SNORA7A	-0.606352	0.00980819
