# Supplementary material for: H/ACA snoRNAs and snoRNPs Dysregulation Links rRNA Modification to Glioblastoma Progression
Source: Research Square preprint supplement (doi:10.21203/rs.3.rs-8079210/v1), 2025-12-11
Supplement: Supplementary file 5 [file afddbeea3dc569a4887474be.xlsx]

## Sheet: Table S1
Table S1. Sequence of qRT-PCR primers used in this study.
gene	forward sequence	reverse sequence
GAPDH	AGATCCCTCCAAAATCAAGTGG	GGCAGAGATGATGACCCTTTT
DKC1	GCTAAGTTGGACACGTCTCAG	TGCAAGAGGTGTATAGTGTGTTG
snoRA46	TCCCCATTCTTGGTTACGCT	GCAACAGCAGAATGGCACAA
snoRA75	TCTTCTCATTGAGCTCCTTTCTGT	GAATTCTCTCTTCTTCTCGTGCG
