# Supplementary material for: H/ACA snoRNAs and snoRNPs Dysregulation Links rRNA Modification to Glioblastoma Progression
Source: Research Square preprint supplement (doi:10.21203/rs.3.rs-8079210/v1), 2025-12-11
Supplement: Supplementary file 6 [file bb72dea77ae0a2035554f9e4.xlsx]

## Sheet: Table S4
Table S4. List of snoRNAs displaying altered expression in GSC and GBM cells and their pertinent pseudo-uridylation sites in 18S and 28S rRNA. Conserved pseudo-uridylation sites according to Taoka et al. 2018 are indicated as well as the frequency of pseudo-uridylation for each site according to BACS analysis (Xu et al. 2024).
snoRNA	Position Ψ	Frequency	Conservation (Human/Yeast)	rRNA	GSC/GBM vs. normal
SNORA56	296	0.51	No	18S	Up-regulated
SNORA75	93	0.91	No	18S	Up-regulated
SNORA71A/B/C/D	406	0.84	No	18S	Up-regulated
SNORA46	572	0.99	No	18S	Up-regulated
SNORA70	1692	0.94	No	18S	Up-regulated
SNORA4	1347	0.9	Yes	18S	Up-regulated
SNORA36A	1244	0.94	Yes	18S	Up-regulated
SNORA14A	966	0.95	No	18S	Up-regulated
SNORA15	1367	0.96	No	18S	Up-regulated
SNORA80B	109	0.95	No	18S	Up-regulated
SNORA22	4975	0.63	No	28S	Up-regulated
SNORA22	4966	0.78	No	28S	Up-regulated
SNORA38	2619	0.88	No	28S	Up-regulated
SNORA62	3830	0.9	Yes	28S	Up-regulated
SNORA62	3832	0.87	Yes	28S	Up-regulated
SNORA48	3797	0.97	Yes	28S	Up-regulated
SNORA27	3694	0.9	No	28S	Up-regulated
SNORA27	4522	0.92	Yes	28S	Up-regulated
SNORA21	4470	0.97	Yes	28S	Up-regulated
SNORA21	4401	0.99	No	28S	Up-regulated
SNORA51	1849	0.92	Yes	28S	Up-regulated
SNORA78	4331	0.89	No	28S	Up-regulated
SNORA78	4266	0.8	No	28S	Up-regulated
SNORA31	218	0.94	No	18S	Down-regulated
SNORA60	406	0.84	No	18S	Down-regulated
SNORA55	36	0.82	No	18S	Down-regulated
SNORA14B	681	0.75	Yes	18S	Down-regulated
SNORA55	681	0.75	Yes	18S	Down-regulated
SNORA8	1081	0.96	No	18S	Down-regulated
SNORA36C	1244	0.94	Yes	18S	Down-regulated
SNORA8	1056	0.93	Yes	18S	Down-regulated
SNORA14B	966	0.95	No	18S	Down-regulated
SNORA7B	1569	0.69	No	28S	Down-regulated
SNORA64	4975	0.63	No	28S	Down-regulated
SNORA30	4643	0.43	No	28S	Down-regulated
SNORA49	2830	0.09	No	28S	Down-regulated
SNORA49	2826	0.14	No	28S	Down-regulated
SNORA74B	3743	0.92	Yes*	28S	Down-regulated
SNORA74B	3741	0.92	Yes*	28S	Down-regulated
SNORA31	3713	0.75	No	28S	Down-regulated
* Conserved in human, yeast, and E. coli
