# Supplementary material for: H/ACA snoRNAs and snoRNPs Dysregulation Links rRNA Modification to Glioblastoma Progression
Source: Research Square preprint supplement (doi:10.21203/rs.3.rs-8079210/v1), 2025-12-11
Supplement: Supplementary file 7 [file e061eb248cc7da004a2cfdab.xlsx]

## Sheet: Table S2
Target ID	Gene	Full Amplicon Sequence	Target Start	Target Length
T00111	RNU105B	TCCAATGTGGATACACCCAGGAGGTCACTCTCTCCCCAGGCTGTGTCCAAGTAGCATAGGGGAGCACAGGGCTCTGTCCCCATGATGTACTGTCCTTTTCCATGACATTGGAGATGAAGCTGGACCTCAACTCTGCACATGCATATTCCTACAACTTCTCAGAGTCCTGTGGATAATGACGGAGGAGAGAAACCATGCAGGAAACAGCC	93	79
T00051	RNU105C	TCCAACATGGATAGTCTGGGAGGTCACTCTCCCCAGGCTCTGTGGAAGTGGTGTTGGGGAGCATAGACGTTTGGTCCATGACGTACAGTACAGCCCCTTTCCACAATGCTGGAGATGAAGCTGGGTCTCCTGTCTGCGCCTGCATATTCCTATAGCTTCCCTGAGTCCTGTGGATGATGACTGGTGAGACAAATCGTGCAGGAAACAAGT	82	85
T00002	SCARNA1	CACTTGATACTAACCGAGCTGTCTATATCCTAGCCTTGTGTCAAAGGCTTGTGATGTGTTGTGATAGCTGGGTTTAAGAAGTGCAATATTAAAACAAAAGCCATGAGTCTTTTAAGCCCAGTGTGTAAAGATACACTCTGAGTTATAAC	29	89
T00171	SCARNA1	CCGAGCTGTCTATATCCTAGCCTTGTGTCAAAGGCTTGTGATGTGTTGTGATAGCTGGGTTTAAGAAGTGCAATATTAAAACAAAAGCCATGAGTCTTTTAAGCCCAGTGTGTAAAGAT	16	89
T00073	SCARNA10	CACTGTAAGGGCAGACCAACAAGAACTTTTTCCTACTTTTGAGCTACCTCTTTTTAATAGGGGTGATTCTTCCAGTTGCTGGAGAGAAATTGTGGTAACTGGAGTGAGAGAGTAGGAACAGGGCATGTTCAGGGTATCAGGGCCAAG	22	105
T00222	SCARNA10	AAGGGCAGACCAACAAGAACTTTTTCCTACTTTTGAGCTACCTCTTTTTAATAGGGGTGATTCTTCCAGTTGCTGGAGAGAAATTGTGGTAACTGGAGTGAGAGAGTAGGAACAGGGCATGTTCAGGGTATCAGG	16	105
T00074	SCARNA11	TTGTCCTGGCCTATTTTTCTGCTCCCCTGTGCTCAGTTCTAACAGGGTAGTCTGGCAGGACACACAGCAATTCCCTCTCAGTTTAGGAGGGCCGTCCTAAGAATAGGGCTGGCTCTTAAAGGCACGAGAGGACAATT	26	70
T00075	SCARNA12	AGACTAAGGCGAATGCGACTCCGTGCTCTCTGGCCCTTGGCTCCTTGTTGGGGGTGGGGACTACAGATGAGATCTGAAATCTTAGTGGTAGTACCTGAGCCATGACTCCCCACTGTAAGGCCAGATCAATAGCATTGGTGGCCTTGCC	22	108
T00223	SCARNA12	AGGCGAATGCGACTCCGTGCTCTCTGGCCCTTGGCTCCTTGTTGGGGGTGGGGACTACAGATGAGATCTGAAATCTTAGTGGTAGTACCTGAGCCATGACTCCCCACTGTAAGGCCAGATCAATAGCATTGGTGGCCT	16	108
T00085	SCARNA13	GTTCCATGTGCAATTTTCCTCTGATAGTTTCTGGTCACTGTTGCCACGGTGATAATGACTGGGCTATGTCATTATCTATCCGCCAACAGTAAGAGAAGCTTTGCAGTCGAGATATTGTTTAGCAGATGGAGTGTTTTCTGTTGAA	26	94
T00232	SCARNA13	CAATTTTCCTCTGATAGTTTCTGGTCACTGTTGCCACGGTGATAATGACTGGGCTATGTCATTATCTATCCGCCAACAGTAAGAGAAGCTTTGCAGTCGAGATATTGTTTAGCAGATGGAGTGT	16	94
T00087	SCARNA14	TGACTGTTCCTGGTATTGATTGCATTTGTTAGTTGTACAGTGCAACCATAGACAGTCACACACATTAAAACAGATGGTTCCTGCCGACAGGGTCTGTATAGTTATCAGATTTTCTGTGCGATGGCTCCATACATGT	28	89
T00234	SCARNA14	GTATTGATTGCATTTGTTAGTTGTACAGTGCAACCATAGACAGTCACACACATTAAAACAGATGGTTCCTGCCGACAGGGTCTGTATAGTTATCAGATTTTCTGTGCGATGGCTCCATA	16	89
T00088	SCARNA15	CTGGAGACTAAGAAAATAGAGTCCTTGAAATCAAGCTGACTCTGCTTTTAGCCTCCTAAATGAAAAGGTAGATAGAACAGGTCTTGTTTGCAAAATAAATTCAAGACCTACTTATCTACCAACAGCA	30	70
T00235	SCARNA15	AATAGAGTCCTTGAAATCAAGCTGACTCTGCTTTTAGCCTCCTAAATGAAAAGGTAGATAGAACAGGTCTTGTTTGCAAAATAAATTCAAGACCTACTTA	16	70
T00106	SCARNA16	TGTTGTTGAGCCTGCCAAGTTGTGGGTGCAGCATGGTACCAGGCAGCCCAACCCTGACCTAAAGTAAATTCCCGGAAGAAGTCTTTCCTGGGTTTTGAATTTGCAGTAACAGGTGTGAGCATTCTAGCAGCAGTTTGATGATCATGTATG	21	102
T00244	SCARNA16	TTGAGCCTGCCAAGTTGTGGGTGCAGCATGGTACCAGGCAGCCCAACCCTGACCTAAAGTAAATTCCCGGAAGAAGTCTTTCCTGGGTTTTGAATTTGCAGTAACAGGTGTGAGCATTCTAGCAGCAGTTTG	16	102
T00107	SCARNA17	GGGTGCGGTGATTGTAGTAGGCTAGGGCGCTTTCGGGTCCCCATTGCAGCCCCCGGATGAGCCCGCAGTATTTTCCTTATATGATCAGGTCCCATTGCGGGCGGCGCCGCTTGCCCGGAGCCTGAGAGGATTATGAAAACGTGGCGAGCG	22	111
T00245	SCARNA17	GGTGATTGTAGTAGGCTAGGGCGCTTTCGGGTCCCCATTGCAGCCCCCGGATGAGCCCGCAGTATTTTCCTTATATGATCAGGTCCCATTGCGGGCGGCGCCGCTTGCCCGGAGCCTGAGAGGATTATGAAAACGTGGCGA	16	111
T00036	SCARNA18	TGCATGTGGAAATGTCTGCTTCTCATTCCTTGGGAGCAGGAATATGTTCATAACATGCTACATTAACAAAGGAGTTCTCAGGGCTGCCAACCTTCTAGTAAAGGTTGAGTGGTAGTATATTTCTCCAAC	24	77
T00197	SCARNA18	GAAATGTCTGCTTCTCATTCCTTGGGAGCAGGAATATGTTCATAACATGCTACATTAACAAAGGAGTTCTCAGGGCTGCCAACCTTCTAGTAAAGGTTGAGTGGTAG	16	77
T00009	SCARNA2	GAAAAGCTCTCCTCCTGCGAAGCCCCCTCGGGGCGCTGTGCAGCGAGGCCCCTTAGGCGGCGGCCACGCTGTGGTCCCCGAGGTCCCGGAGCTGGCCCTGCGGGGCCCGGCGCTCAGAAGTGATGAATTGATCAGATAGACGAGGCCGGG	22	110
T00175	SCARNA2	CTCTCCTCCTGCGAAGCCCCCTCGGGGCGCTGTGCAGCGAGGCCCCTTAGGCGGCGGCCACGCTGTGGTCCCCGAGGTCCCGGAGCTGGCCCTGCGGGGCCCGGCGCTCAGAAGTGATGAATTGATCAGATAGACGAGGC	16	110
T00104	SCARNA20	GCCTCTCTCCCATGGGCTTTGGGGGGTCCCTGTTCTCCTTAGCCAAGGCTGGAGGCCAAGAGCAGCCCTCGAGGATCGTCGTCAGGACTGCCACGAGTGGGGCAGCCTTGTTTTCCTGCCTCAGACATGT	45	62
T00098	SCARNA21	GGCTCGATTTCCTGGGGGGTGGTCTCAGCCCACTCCACCTCCCCTCAGCCGAGCCTAGAGTAGAGGGGCCAGGCATCCTCCCCAGGGGAGGGGCGTTGAAGCAAGGAGCCTCTCCTGGGCTGTCCTAGCCTCACATTT	37	63
T00033	SCARNA22	GCGCTCACTAAGGCTCGGTCCTCTCCACGTGGTCCTGACCTGTCCTCTGTGAGCAAGAGAAACAGGACTGGTTTGGGGGTGTCCTGTCTCAGTGGACACAGGACACCACGGTTTTCAGTACAACA	20	82
T00118	SCARNA23	TGGACATTTATTTTTATTCAGTTTCTTCTCAAGGTGAAGATAACTCTTTGTAAATGTCCTACAGAAATATAGTAGCTTTCTGTTCTTCCTTTGCAAGTAAAAAGGGTGGGTCGTTCCACTACTGACATTT	38	69
T00040	SCARNA27	TGAGGTCTGCGCAGGCCCCAACCTATCCATGGTTTGGGGCTGCTATCTGCCTCATAAAGCAAAGTGGAGGGTTTGTCTTTTGGAAAAACAAAGTCGTTTTCTCCTCTGAAAAAGCCTCCTACATAG	34	64
T00011	SCARNA3	AATGGAAGCTGCTGGAACCAGCCATGTGGACAAATGAAAAAATGCCTTTTGTCTACAGATTGCAGCGATCCTACATAAATATATGGAGGTCTCTGTCTGGCTTAGGACAGCTGGCTAAGTCTGATCGTTCCC	21	91
T00176	SCARNA3	AAGCTGCTGGAACCAGCCATGTGGACAAATGAAAAAATGCCTTTTGTCTACAGATTGCAGCGATCCTACATAAATATATGGAGGTCTCTGTCTGGCTTAGGACAGCTGGCTAAGTCTGATC	16	91
T00010	SCARNA4	ACTGGAGGACTAAGAAGGCTGAGTCTGATGAAGTAAGACTTTGCTGATACATTCCTCCTAGAAAAAAGGGTTGGAGAGAGCAGCCTTCACTGAAGAGTATCACAGGGCTGACTGTACTACCCAACACTC	29	78
T00022	SCARNA5	AACTCCCAGCAGCCCATTTTTTCCCTCCCGTCACATTTAAGTCATGTGTATGGGATCATGGAGCAGCTGATAATTTGGGATTCTGTCAGTGTGTGTTTCTGAGAGTGATCGGCTCACAGCTGACGAGTATCCAACAAAACCAGTT	20	101
T00186	SCARNA5	CCCAGCAGCCCATTTTTTCCCTCCCGTCACATTTAAGTCATGTGTATGGGATCATGGAGCAGCTGATAATTTGGGATTCTGTCAGTGTGTGTTTCTGAGAGTGATCGGCTCACAGCTGACGAGTATCCAAC	16	101
T00023	SCARNA6	GCAGCTGACACTCCGTGATGTCCCTCATTCTGTGTTCCTCCGTGAGCTCAGGGAAGACACTGGTTGGCATCCAACAGCTTAGTCACAAAGGGATTTGATTGTTGGGAGTGCTGGTATCTGTGGCTATGATCTGCCTTGTTCAAGCTGAG	20	105
T00187	SCARNA6	CTGACACTCCGTGATGTCCCTCATTCTGTGTTCCTCCGTGAGCTCAGGGAAGACACTGGTTGGCATCCAACAGCTTAGTCACAAAGGGATTTGATTGTTGGGAGTGCTGGTATCTGTGGCTATGATCTGCCTTGT	16	105
T00029	SCARNA7	GTGTGCTTGTGGTGGCTATGGAAAGGGGGCACTGACTGGTGATGCTGATATTGGAGTGCATCTGAGGCTGTTGTAGAAATAACATGGGTTGTTGATTACAACATTGCCAATGATTATAACCCAAGAACAGCTCACCTAACTAGCCTG	21	105
T00192	SCARNA7	CTTGTGGTGGCTATGGAAAGGGGGCACTGACTGGTGATGCTGATATTGGAGTGCATCTGAGGCTGTTGTAGAAATAACATGGGTTGTTGATTACAACATTGCCAATGATTATAACCCAAGAACAGCTCACCTAAC	16	105
T00053	SCARNA8	TGGGAGGCTGATACACAAATTGGGCTGAAATACTGCTCTACTTGTCACCATGCCTCCCTAGAATAAACTGCCTTTTGATGACCGGGACGAATTGAGTGAAATCGTAACGGACAGATACGGGGCAGACAGAT	50	61
T00067	SCARNA9	CTGAGATCTGCTTTTAGTGAAGTGGATCAATGATGAAACTAGCCAAATCTGAGCATCAGAAGTCTTTCCAGTCTACCTGATGCATGATCTCTACAGTTCTGAGAAGCAAAACTATAAAACAATGTAAAACAATAAGGGCATATGTCTGGT	28	95
T00219	SCARNA9	TTTAGTGAAGTGGATCAATGATGAAACTAGCCAAATCTGAGCATCAGAAGTCTTTCCAGTCTACCTGATGCATGATCTCTACAGTTCTGAGAAGCAAAACTATAAAACAATGTAAAACAATAAGG	16	95
T00069	SNORA1	CTCATTCTAGAGAATGGGCACTGTTGATCATGGTGTCCAAAAATAGTTAATGTGGCTAAATTGAGACAGGTTATGCTTCCATCACAGTATGCATATTGCAGTGGTGACAATGAGACCTGTAACATTT	26	76
T00220	SNORA1	AGAATGGGCACTGTTGATCATGGTGTCCAAAAATAGTTAATGTGGCTAAATTGAGACAGGTTATGCTTCCATCACAGTATGCATATTGCAGTGGTGACAATGAGAC	16	76
T00089	SNORA10	GGTCTCTCAGCTCCGCTTAACCACACGGGTCCAGTGTGTGCTTGGCGTGTTTTCAGGGAGGCAGAGAAAGGCTCTCCTAATGCACGACAGACCCGCCCAGAATGGCCTCTCTGTTCCTAGGAGTGCGACAATT	22	90
T00236	SNORA10	TCAGCTCCGCTTAACCACACGGGTCCAGTGTGTGCTTGGCGTGTTTTCAGGGAGGCAGAGAAAGGCTCTCCTAATGCACGACAGACCCGCCCAGAATGGCCTCTCTGTTCCTAGGAGTGC	16	90
T00122	SNORA11	GGGGTGTGCTCAGAGCAGGGGGCCCAAAGAATGGCTCCTCTGTTTACAACACACCCAACAGGAATCTGGGGTCATTGTGATGAGGGCGTCAAACTTGTGGCTTCCCTATGAACAAACGTCCCCCAACACCT	21	70
T00084	SNORA11B	GGGTGTGCTCAGAGCAGGGGGCCCGAAGAATGCCTCCTCTGTTTACAACACACCCAATAGGAATCTGGGGTCATTGTGACAAGGGACACAGAGCTTGTGACCTCCCTACAAACAAATGCCCTACACA	39	61
T00119	SNORA11C	GGGTGTGCTCAGAGCAGGGGGCCTGAAGAATGCTTCTTCTGTTTACAACACACCCAATAGGAATCTGGGGTCATTGTGACGGGGGGCACAAAACTTGTGACCTCTCTATGAACAAATGCCCCACATG	19	71
T00121	SNORA11D	GGGTGTGCTCAGAGCAGGGGGCCTGAAGAATGGCTCCTCTGTTTACAACACACCCAACAGGAAGCTGGGGTCATCGTGATGAGGGGCACAAACTTGTGGCCTCCCTACAGACAAATGCCCTACATGT	20	74
T00120	SNORA11E	ACATGTAGGGCATTTGTCTGTAGGGAGGCCACAAGTTTGTGCCCCTCATCACGATGACCCCAGCTTCCTGTTGGGTGTGTTGTAAACAGAGGAGCCATTCTTCAGGCCCCCTGCTCTGAGCACACCC	29	80
T00057	SNORA12	TGGTGGTTTTCTTTTTGGCACATTTGTTAAGTTTTCAAATGGGCCTAACTCTGCCACATATATAATATCGGAGATGGCAAAGGCTTGTGACGGAGATATCTCTCTTAAGCCTTTCCTGCATCAGAGAATGGCTCCCACATG	26	94
T00211	SNORA12	CTTTTTGGCACATTTGTTAAGTTTTCAAATGGGCCTAACTCTGCCACATATATAATATCGGAGATGGCAAAGGCTTGTGACGGAGATATCTCTCTTAAGCCTTTCCTGCATCAGAGAATGGCTC	16	94
T00037	SNORA13	AGCCTTTGTGTTGCCCATTCACTTTGGAAACTAGTGAATGTGGTGTCAAAAAAGGCGTAAATTAAACGCTTTGCAGCCTTTTCCTGCCCTTAAATTTGATACCTTTGGTGTAGGAGCTGCATAAGTAACAGTT	22	81
T00050	SNORA14A	CATTCTTAAACCCTCTTGGTGGCTTCCCTGTAAATGCTTCCAAGATATGAGCGAATGCTATAGAAATTGCAGGAAAGTCCAAAGGGCTGCGCGTCTCCTGTGGCTCAGTCTTATTTCATACCTGCAACATCT	25	80
T00207	SNORA14A	ACCCTCTTGGTGGCTTCCCTGTAAATGCTTCCAAGATATGAGCGAATGCTATAGAAATTGCAGGAAAGTCCAAAGGGCTGCGCGTCTCCTGTGGCTCAGTCTTATTTCAT	16	80
T00014	SNORA14B	GCATTCTTAAACCCTCTTGGTAGCTTCGTTCTAAGTGCTTCCAAGATATGAGTGAATGCTATAGAAATTGCAGGGGAGTCCAAAGGGCTGCGCTTCTCCCGTGGCTCAGTCTTATTTCATACCTGCGACATCT	27	79
T00178	SNORA14B	CCCTCTTGGTAGCTTCGTTCTAAGTGCTTCCAAGATATGAGTGAATGCTATAGAAATTGCAGGGGAGTCCAAAGGGCTGCGCTTCTCCCGTGGCTCAGTCTTATTTCAT	16	79
T00048	SNORA15	GCATGGCCGAATACTGTGTTTTTATCAGTAGTTTACACAGCCAGACACCATGCAAAAGCAGTCTTCCCTTTAGAATGACTGATGGTATGCTAAGGTTTTTCATAGCATATCATTATTAAAGGTGAATACAAAT	28	64
T00006	SNORA16A	TGGCCCTTATCGAAGCTGCAGCTGCTTCCGCATAGCTGCTGTGGTCAAAAAGGAGCCCAGAGTGACAGTTTTCCTTGACGGTCGCCGTTCTGTTTGTTGTAACTGATCTGCAACATTTTGGGAAAA	20	79
T00172	SNORA16A	CCTTATCGAAGCTGCAGCTGCTTCCGCATAGCTGCTGTGGTCAAAAAGGAGCCCAGAGTGACAGTTTTCCTTGACGGTCGCCGTTCTGTTTGTTGTAACTGATCTGCAA	16	79
T00013	SNORA16B	TGGCCTTTATCAAAGCTGCAGCTGCTTCCATGTAGCTGCTGTGGTCAAAAAGAAGCCAAGAGTGACAGTTTTCCTTGATGGTCATAGTTCTGTTTGCTGTAACTGATCTGCAAGATTTTGGGAAAATACCATT	30	67
T00071	SNORA18	GTTGAGGTCTATCCCGATGGGGCTTTTCCTGTAGCCTGCACATCGTTGGAAACGCCTCATAGAGTAACTCTGTGGTTTTACTTTACTCACAGGACTATTGTTAGATCTGTGGGAAGGAATTACAAGACAGTT	42	65
T00058	SNORA19	GCACATTTCATTGACCTGCTTTCTTTTATGTGAGTAGTGTTATTTCTTATGTGCTATACAAATAATTGAAGGCTAATTAGCAGTATAACTATAAATAGTAATGCTGCCAGTCTCCTTCAGACAAA	29	76
T00212	SNORA19	ACCTGCTTTCTTTTATGTGAGTAGTGTTATTTCTTATGTGCTATACAAATAATTGAAGGCTAATTAGCAGTATAACTATAAATAGTAATGCTGCCAGTCTCCTTCA	16	76
T00103	SNORA21	TTTTAAAAGCACTCAATGGGCCTGTGGCTAATGACCTATTGAGCCGTCAAGAAAGGGGAGAGTGAAAACATCGCTTTTGGGTGAAGTGGCAACATGTGTTGTTTGCTTCAATCGGTGGTGTGACAAG	25	81
T00243	SNORA21	CACTCAATGGGCCTGTGGCTAATGACCTATTGAGCCGTCAAGAAAGGGGAGAGTGAAAACATCGCTTTTGGGTGAAGTGGCAACATGTGTTGTTTGCTTCAATCGGTGGTG	16	81
T00049	SNORA22	TTGCACAGTGAACACCCAAGTGTGCTTTATAGTTCCCTTGGCTTTGACCCTGTGCTAGAGCATTGCCTGCTCTTCTCCTCTGCATTAAAAGGAATATTTATCCTTTTAAATGTATTCAGAAAGCCAGCACATTA	37	63
T00060	SNORA23	GCATAGGTTTCATCTGTGTCTGGTAGCAGTGTCTGTCTGTGTTTTTCATTCAGATCTTGCTATCCACACAAACATCATGCGGCCAAAGAGTAACTTGGGATCATAGTACTGGTCTAGTGTTGTCTCTGGACACATCTACCACTGGCCAGC	25	107
T00214	SNORA23	TCATCTGTGTCTGGTAGCAGTGTCTGTCTGTGTTTTTCATTCAGATCTTGCTATCCACACAAACATCATGCGGCCAAAGAGTAACTTGGGATCATAGTACTGGTCTAGTGTTGTCTCTGGACACATCTACCACTGGC	16	107
T00034	SNORA24	CCATGTATCTTTGGGACCTGTCAGCCGTGGCAGTCTCCCTTCCTAGCCATGGAAGAGCATATCCTTGTTTATTGGCAAAGCTGTCACCATTTAATTGGTATCAGATTCTGACTTGCACAAGTAACA	24	76
T00195	SNORA24	CTTTGGGACCTGTCAGCCGTGGCAGTCTCCCTTCCTAGCCATGGAAGAGCATATCCTTGTTTATTGGCAAAGCTGTCACCATTTAATTGGTATCAGATTCTGACTT	16	76
T00068	SNORA25	GGGTCATTTCAAAGAGGGCTTATGAGGCTGTGAAACCCAGAGCTCTTAACGCTGTGACCAAAGATGGAAGTTCTCTATAGGAAGCCATAGCACTCCTAATGTTTGGTGCTATGTTTTCCTGAGGAGATATAAAA	35	66
T00081	SNORA27	ACCCCCTTTTCACTTTGCCAGTTGGACTTATGTCTTTATTGGTCATTCAAGTGGGGCAAAGGAAATATCCTTTTAAAACTCAGGCAAACTGGGTGTTTGTCTGTATCCTGTCAGAGGAAACAAAT	21	78
T00229	SNORA27	CTTTTCACTTTGCCAGTTGGACTTATGTCTTTATTGGTCATTCAAGTGGGGCAAAGGAAATATCCTTTTAAAACTCAGGCAAACTGGGTGTTTGTCTGTATCCTGTCA	16	78
T00086	SNORA28	AAGCAACACTCTGTGGCAGATGATCAAAACTGTCTGACACAATTTGAGCTTGCTATAGCAAGAAAGTCTAACCTATTCCGGTGTTCTCTCTCCCATGAGACAAGCCGTTATATAGACTTAAACAGT	22	76
T00233	SNORA28	CACTCTGTGGCAGATGATCAAAACTGTCTGACACAATTTGAGCTTGCTATAGCAAGAAAGTCTAACCTATTCCGGTGTTCTCTCTCCCATGAGACAAGCCGTTATA	16	76
T00043	SNORA29	TTTCTCATTTGACTACCACATTTTCTCCTAATAATAGATTTTAGTGGCTATGCTTATGGGATAGATTAAACTTGCCATGATCTGAAGAGGGAGGGTTTTTTCATGTCCTCCTCCTATATGAAATGGCTGAA	32	74
T00202	SNORA29	CACATTTTCTCCTAATAATAGATTTTAGTGGCTATGCTTATGGGATAGATTAAACTTGCCATGATCTGAAGAGGGAGGGTTTTTTCATGTCCTCCTCCTATATG	16	74
T00076	SNORA2A	AGGCCCTGAATCAAGACCAATGGTTTGCTGTAGCTGTTGGTTTCAAACAGGAGCTAAGAGTGATGTCTTCCTTGTGGTCTGTTGGCTATTCAGTATTCCAGTGCGAATTGCCAATTCAGTTGGAAGAAACATAG	21	86
T00224	SNORA2A	CTGAATCAAGACCAATGGTTTGCTGTAGCTGTTGGTTTCAAACAGGAGCTAAGAGTGATGTCTTCCTTGTGGTCTGTTGGCTATTCAGTATTCCAGTGCGAATTGCCAATTCAGTT	16	86
T00077	SNORA2B	CTGAATCAAGGCCAGCAGTTTGCTGAAGCTGTTGGTTTCAAGCAGGAGCCTAAAGAATTGTCTTTCTATGGTCTGTTGGCCATTTCATAACTTTGGAAATGTAATGGTCAATTCATTAGAAAGAAACATGA	23	76
T00225	SNORA2B	AAGGCCAGCAGTTTGCTGAAGCTGTTGGTTTCAAGCAGGAGCCTAAAGAATTGTCTTTCTATGGTCTGTTGGCCATTTCATAACTTTGGAAATGTAATGGTCAATT	16	76
T00092	SNORA30	TGGCACTTTCACAGTTCCTTCCCCAGGCAGTGGGGCCAGGATTTGGTAGCTGGTGCTGAGAGAAAACCCTTGATTGTATTCTTGCCCTGGGATTATACCAGTGGCAACTGTCACTCAATGGGACA	23	81
T00238	SNORA30	TTCACAGTTCCTTCCCCAGGCAGTGGGGCCAGGATTTGGTAGCTGGTGCTGAGAGAAAACCCTTGATTGTATTCTTGCCCTGGGATTATACCAGTGGCAACTGTCACTCAA	16	81
T00082	SNORA31	CTGCATCCACTGATAGACCTTGAACAATTTACTGTTGTTCTTTTGGTTTGCACTAGGATGCAAAAGAAAGAAATCCCTGCGCTTTCTGTCTGTCTTTGTGGCGGCCCAGATTGAATTGGGGAATACA	26	78
T00230	SNORA31	TGATAGACCTTGAACAATTTACTGTTGTTCTTTTGGTTTGCACTAGGATGCAAAAGAAAGAAATCCCTGCGCTTTCTGTCTGTCTTTGTGGCGGCCCAGATTGAATTG	16	78
T00042	SNORA33	AAGCCAGCCAATGAATCTGCTTACCTGATTGTGTTTGTGCAGACATACTTTAAAAACTGGCAATAGTAAAGCCATGTTACGAGCCTTAAGGACATTGAAGTCGTTAAGGTCCCTGAGAATGGCTATAACA	21	84
T00201	SNORA33	AGCCAATGAATCTGCTTACCTGATTGTGTTTGTGCAGACATACTTTAAAAACTGGCAATAGTAAAGCCATGTTACGAGCCTTAAGGACATTGAAGTCGTTAAGGTCCCTGAGAA	16	84
T00123	SNORA35	CAGCACTGCCAAGTGACCCATTGGGCTCCATCTTGACCAACTGGGCATCAAGCGGTGCAAAAGCAAATCCCTCTCAAAGCTGGGAGAGTCACACCGTGGGCTACTCCTGCATGCAGCTGGGTACATAT	21	84
T00126	SNORA36A	TTCCAAAGTGTTGAGTTCAGTCCAGGGCAGCTTCCCTGTTCTGTTAATTAAACTTTGGGACATTAAAATGGGCTAAGGGAGATGATTGGGTAGAAAGTATTATTCTATTCATTTGCCTCCCAGCCTACAAA	25	86
T00254	SNORA36A	GTTGAGTTCAGTCCAGGGCAGCTTCCCTGTTCTGTTAATTAAACTTTGGGACATTAAAATGGGCTAAGGGAGATGATTGGGTAGAAAGTATTATTCTATTCATTTGCCTCCCAGCC	16	86
T00017	SNORA36C	AAAGTGTTGAGTTCAGTCCAGGGCAGCTTCCCTGTTCTGTTAATTAAACTTTGGGACATTGAAATGGGCTAGGGGAGATGATTGGGTAGAAAGCATTATTTTATTCATTTGCCTCCCAGCCTACA	24	82
T00181	SNORA36C	GAGTTCAGTCCAGGGCAGCTTCCCTGTTCTGTTAATTAAACTTTGGGACATTGAAATGGGCTAGGGGAGATGATTGGGTAGAAAGCATTATTTTATTCATTTGCCTCCCAGC	16	82
T00108	SNORA37	TGAGCACTTTCACAGGTCCTCCCTCAGGCTGTGGGGCCAGGATTTGGTAGCTGGTGCTGAGAGAAAACCTTTGTTGGCATCCTTGCCCTGGGACTGTGCCAGTGGCAGCTGTCATTCAATGGGACAATT	25	76
T00041	SNORA38	TCCTCCTACAAAGGCGTGTCTGTGGTTCCCTGTCTTTGGACACGTAAGAATTGGAGGAAAATAAATGTGGATTTGGGAAACTTTGAGGCCAGCTTGCTTCTTGCAGGCTCATGATCAACCAATCTCAC	22	83
T00200	SNORA38	TACAAAGGCGTGTCTGTGGTTCCCTGTCTTTGGACACGTAAGAATTGGAGGAAAATAAATGTGGATTTGGGAAACTTTGAGGCCAGCTTGCTTCTTGCAGGCTCATGATCAAC	16	83
T00105	SNORA38B	CCTCCTACAAAGGCATGTCTATAGTTCCTTGTCTTTGGACATGTAAGAATTGGAGGCAAAGAAATGTGGACTTGGAGAAATCTGGGGCCAGCTTGCTCTCCGCAGGCTCAAGATCAACCATCCCACATAGAA	29	77
T00032	SNORA4	TACCAAAAGTTAGCTTTTTGGGGGGCAGGTTTTTAAGTAACCTTTGCCAACTTGGGCTATTTGGAAGAGTAAAAGACCACACTCCACAGTGGGCTATACCACTTAGTATAGTTCGCTACTATTTTGTGGCCTACATG	52	61
T00072	SNORA40	TGCACTTATGTATGTTTTTGTTTAACGTGGACAAAGACTTACAGATAGGTGCAAAAAATAAATCCTCTTTTGCAACCCAGAACTCATTGTTCAGTATGAGTTTTGATACATATAAGAAGGGATATTA	29	62
T00020	SNORA41	CCACAGCTACTGGTCTGCAGCTGTTCTTATGGTAGCAGTTGTGGCATTCCTCTGTGGGAAAGAAACTGTTAACACAAACACCTCTTTCTTAGCAAAACAGAAAGTGGGTATATATGTGTGACAGACAC	20	81
T00184	SNORA41	AGCTACTGGTCTGCAGCTGTTCTTATGGTAGCAGTTGTGGCATTCCTCTGTGGGAAAGAAACTGTTAACACAAACACCTCTTTCTTAGCAAAACAGAAAGTGGGTATATAT	16	81
T00005	SNORA44	CAGCATGTTTCCAAGGGCTGTGGCTGGTCATAGCCATGGGATCTCCAACTGCATGCAAGAGCAACCTGGAAAGACTTTGACAGCGCAGGTCAGTACAATACCTGCAAGCTGCCACTCAGCTTTCCTATAATG	25	78
T00093	SNORA46	AGCACTATATTTAAACCTGTGGATGGGAATATTCCCCATTCTTGGTTACGCTGTAGTGCAAAAGAATTCCTGGCTCTCTGTTGCACAGCTGACTTGTGCCATTCTGCTGTTGCTGTATAGAGTTAAGG	29	72
T00239	SNORA46	AACCTGTGGATGGGAATATTCCCCATTCTTGGTTACGCTGTAGTGCAAAAGAATTCCTGGCTCTCTGTTGCACAGCTGACTTGTGCCATTCTGCTGTTGCTG	16	72
T00035	SNORA47	GACTGAGAAGGTGAGGCAGTTTTGCCCCGTGCTGCCTTCCACCGGTTAAGACCTCCAAAATCGAAGGGCTGCCCAGGCAGAGGATGTCCCCTTGCCACCCTTGGAGGGGCAGCGCTGTGCTGGCCGACATTTG	24	91
T00196	SNORA47	AGGTGAGGCAGTTTTGCCCCGTGCTGCCTTCCACCGGTTAAGACCTCCAAAATCGAAGGGCTGCCCAGGCAGAGGATGTCCCCTTGCCACCCTTGGAGGGGCAGCGCTGTGCTGGCCGACA	16	91
T00095	SNORA48	TGTCCCTGACCTGGGTAGAGTGGCATCTGGTTGGTGATGCCCATCTCATATCAGCCAGGGACAAAGCAACTCCTTGTTCATCCCAGCTTGGCTTTTGATCCGTGCCCATGCCTGGTTCATGCCTTGGACACAT	20	93
T00241	SNORA48	CCTGACCTGGGTAGAGTGGCATCTGGTTGGTGATGCCCATCTCATATCAGCCAGGGACAAAGCAACTCCTTGTTCATCCCAGCTTGGCTTTTGATCCGTGCCCATGCCTGGTTCATGCCTTGG	16	93
T00080	SNORA49	CCTCAGCCTTACTCCAGGGACTTTTTGTTGCCTGTAAAGTGCTCTGGCATTGCCTGAGGATAGATGAGAAAGCACATATCCCTCCCCAGTAAGACGCTGTTTTCTTTTGGGGCCTACAAGTTGAG	21	82
T00228	SNORA49	GCCTTACTCCAGGGACTTTTTGTTGCCTGTAAAGTGCTCTGGCATTGCCTGAGGATAGATGAGAAAGCACATATCCCTCCCCAGTAAGACGCTGTTTTCTTTTGGGGCCTAC	16	82
T00110	SNORA51	GGCCTCCTGGTGCTTACCACAGGCTGTGTTCTTACACTGACTGTATAGAAAGAGGAGGTAGAGTAAACCTACCCCATATACACCTCAGCTCAGGCCCTGTGCCTGGTCTGTATTGTGAATGGGGGAACATAG	24	80
T00059	SNORA52	CTAATCCCTGCCGGTCCATCTGTGGCCTGCCAGGTTTCGCTTGTGGACCAGAGCACCCTAGAAGCCTCACCCGAGGAGTGAGCAGGGCTCCAGTGGGCTCACGTCATGGGCACTTCTAGACACTC	20	83
T00213	SNORA52	TCCCTGCCGGTCCATCTGTGGCCTGCCAGGTTTCGCTTGTGGACCAGAGCACCCTAGAAGCCTCACCCGAGGAGTGAGCAGGGCTCCAGTGGGCTCACGTCATGGGCACTTCT	16	83
T00079	SNORA53	AACATGCTTCCTTAGATCCACCTTTGTGGATGAATCTTGAACTGAGTTCCACTTGTAAACTTCTTGTTTCTTGTGGTTCCAGTAGTCAAAGAAACATCCAGCAACTTTTTTGGTTGTATAGTCAAAGGTGCTTGAGTCATTGGCA	26	99
T00227	SNORA53	CTTAGATCCACCTTTGTGGATGAATCTTGAACTGAGTTCCACTTGTAAACTTCTTGTTTCTTGTGGTTCCAGTAGTCAAAGAAACATCCAGCAACTTTTTTGGTTGTATAGTCAAAGGTGCTTGAGTCA	16	99
T00007	SNORA55	GCACCTGAATCTTTCCCATTCCTTGCTGCCTCGTGCCGGTGTGGGGACAGATGGTGCTACAGAATGAGCAGAGGAAATCCAGACAGGTTGTTTTCCATTTGTCTTGGGGCCTGTCTCTACAGCTCTGCCACATTT	25	89
T00173	SNORA55	TCTTTCCCATTCCTTGCTGCCTCGTGCCGGTGTGGGGACAGATGGTGCTACAGAATGAGCAGAGGAAATCCAGACAGGTTGTTTTCCATTTGTCTTGGGGCCTGTCTCTACAGCTCTGC	16	89
T00127	SNORA56	CGGCAGACAGTTATCCCTTTCTAGTCTGGCTCGTGGGACTCTAGAGGGAGTCAGTCTGCAACAGTAAGTGGTGAGTTCTTCTGTCCAGCGTCAGTATTTTGATGGTGGCTTTAGACTTGCCAGATAACA	24	82
T00255	SNORA56	AGTTATCCCTTTCTAGTCTGGCTCGTGGGACTCTAGAGGGAGTCAGTCTGCAACAGTAAGTGGTGAGTTCTTCTGTCCAGCGTCAGTATTTTGATGGTGGCTTTAGACTTGC	16	82
T00062	SNORA57	GGGATCGGGCTTGTGGTGCCGCTCCCCGTAATGTACGGAGGAAGAGGGAAAGGGCTCTGGCCCCCTCGGCGTCATGTCTTCGGTGCTGGCGGCTTCCCATCCGCTGGTTCTATCCTCAAACGCCGGG	19	89
T00215	SNORA57	ATCGGGCTTGTGGTGCCGCTCCCCGTAATGTACGGAGGAAGAGGGAAAGGGCTCTGGCCCCCTCGGCGTCATGTCTTCGGTGCTGGCGGCTTCCCATCCGCTGGTTCTATCCTCAAACG	16	89
T00028	SNORA58	GCATACTCGTAGACCTTGCCTGACTGTGCTCATGTCCAGGCAGGGGGGACAGTGTATGCAAGAATAATTTGGAGTTCCTGCCAGCTCTAACCAGCTTCATCAGTGGCTGGATAAATTGCAGGACTCTAAACATTTCCCT	22	92
T00191	SNORA58	TCGTAGACCTTGCCTGACTGTGCTCATGTCCAGGCAGGGGGGACAGTGTATGCAAGAATAATTTGGAGTTCCTGCCAGCTCTAACCAGCTTCATCAGTGGCTGGATAAATTGCAGGACTCTA	16	92
T00001	SNORA59A	CCCAGGGTATGTTCACGGGGCGATGCTGCCCTCCCAGCTGGCCCATGGGTGACCCTGGGAACATTAACTGCCTCACAACGTTTGTGCCTCAGTTACCCGTAGATGTAGTGAGGGTAACAATACTTACTCTCGTTGGTGATAAGGAACAG	20	104
T00170	SNORA59A	GGGTATGTTCACGGGGCGATGCTGCCCTCCCAGCTGGCCCATGGGTGACCCTGGGAACATTAACTGCCTCACAACGTTTGTGCCTCAGTTACCCGTAGATGTAGTGAGGGTAACAATACTTACTCTCGTTGGTG	16	104
T00102	SNORA59B	GCCCAGGGTATGTTCACGGGGCGATGCTGCCCTCCCAGCTGGCCCATGGGTGACCCTGGGAACATTAACTGCCTCACAACGTTTGTGCCTCAGTTACCCGTAGATGTAGTGAGGGTAACAATACTTACTCTCGTTGGTGATAAGGAACAGCT	41	68
T00045	SNORA5A	TGCAGCCGTGTCAAATTCAGTACCTGTCCTATGCATGGTAGGCACTGGCCCAGAAGGCTGCCACAGAAACACTGTGACTCATGGGCCCTGTTCCTGTGTCCCAGGCTCAGGGATAAATTTGGTTACAGACATCA	23	84
T00204	SNORA5A	GTGTCAAATTCAGTACCTGTCCTATGCATGGTAGGCACTGGCCCAGAAGGCTGCCACAGAAACACTGTGACTCATGGGCCCTGTTCCTGTGTCCCAGGCTCAGGGATAAATTTG	16	84
T00047	SNORA5B	GGCAGCCATGTCAAATTCAGTGCCTGCCCTGTCTATGGTAGGCACTGGCCCAGAAGACTGCCACAGAAACAGTGACTCACAGGCCCTGTTACTGTGTCCCAGGCTCAGGGATAAATTTGGTTACAGACACCA	22	85
T00206	SNORA5B	CATGTCAAATTCAGTGCCTGCCCTGTCTATGGTAGGCACTGGCCCAGAAGACTGCCACAGAAACAGTGACTCACAGGCCCTGTTACTGTGTCCCAGGCTCAGGGATAAATTTGGT	16	85
T00046	SNORA5C	CAAGTCAAATTCAGTGCCCGTTTCTGTCATAGCGGGGGCTGGCCCAGATGGCTGCCACAGCAAGCTCCACAGCTCATGGGCCCTGGGTCACCTACCCTGGGACCTGGGGATAAGTTTGGCTGTGGACA	24	83
T00205	SNORA5C	ATTCAGTGCCCGTTTCTGTCATAGCGGGGGCTGGCCCAGATGGCTGCCACAGCAAGCTCCACAGCTCATGGGCCCTGGGTCACCTACCCTGGGACCTGGGGATAAGTTTGGCT	16	83
T00025	SNORA6	CACACTATTAAAGCTCAGGGTGGAGGCCAGTCTTGGCTCATGAACTTCTGAGTGTCGGAAGTGTGCTATATCAATGGCAGGATTTTCGCTAACACCAGTAGAGCTTGCCTCTATGACTGGAGTTTGGTAGTACTCGCTGCCAC	25	98
T00188	SNORA6	AAAGCTCAGGGTGGAGGCCAGTCTTGGCTCATGAACTTCTGAGTGTCGGAAGTGTGCTATATCAATGGCAGGATTTTCGCTAACACCAGTAGAGCTTGCCTCTATGACTGGAGTTTGGTAGTACTCGC	16	98
T00117	SNORA60	CACCTGCATTCAAAAATGATCACGGGCTGCCTGTGCTCTGGTCATCAATAACGCAGGGAGAGGAATTGCTGAAAGCCGTTTCCCGTGTTTGGAGGGTTCACACCTGTCCCTTTCAAATGCTGGCGCTTTCACACAC	25	91
T00004	SNORA61	ATCCTCCTGATCCCTTTCCCATCGGATCTGAACACTGGTCTTGGTGGTCGTAAAAGGAGGAAAAGTAATAGTGAAGCTGGCCTAAATGTTGTAATCTGGTATATGGCATGTGGGCTAGTTTCAGACAGGT	24	85
T00026	SNORA62	TGTGCACATTGTTAGAGCTTGGAGTTGAGGCTACTGACTGGCCGATGAACTCGCAAGTGTAGGTAGTGTGCTACATGAGGGGCAAGTTTTCGCTAACACCACAAGGGTCTCTGGCCCAATGAGTGGA	24	84
T00189	SNORA62	TTGTTAGAGCTTGGAGTTGAGGCTACTGACTGGCCGATGAACTCGCAAGTGTAGGTAGTGTGCTACATGAGGGGCAAGTTTTCGCTAACACCACAAGGGTCTCTGGCCCAATGA	16	84
T00031	SNORA63	AAAGCAGGATTCAGACTACAATATAGCTGCTAAGTGCTGTGTTGTCGTTCCCCCTGCTTAAAATAAAGTTGTTTCTTAACTATACCTGTCTGCTATTCTCCTGTAGCAGCCAGGGACGCTTGGTCTCATACA	29	83
T00194	SNORA63	GACTACAATATAGCTGCTAAGTGCTGTGTTGTCGTTCCCCCTGCTTAAAATAAAGTTGTTTCTTAACTATACCTGTCTGCTATTCTCCTGTAGCAGCCAGGGACGCTTGGTCT	16	83
T00090	SNORA64	ACTCTCTCGGCTCTGCATAGTTGCACTTGGCTTCACCCGTGTGACTTTCGTAACGGGGAGAGAGAGAAAAGATCTCCTCAGGACCTCGGATGGGCCTTACTGTGGCCTCTCTTTCCTTGAGGGGTGCAACAGGC	22	95
T00237	SNORA64	TCGGCTCTGCATAGTTGCACTTGGCTTCACCCGTGTGACTTTCGTAACGGGGAGAGAGAGAAAAGATCTCCTCAGGACCTCGGATGGGCCTTACTGTGGCCTCTCTTTCCTTGAGGGGTGCAACA	16	95
T00056	SNORA65	GCCACTGCACCTGACCAGGTCTCTGTTGGCTGGTGCAATCCAGTGGTGAGCTGATAGTAAACCCCAGCTTAGGAAACAGGGTTGTTCTTCATGTGGATGACTCTGTGCCGAAAGCATGGGAACAGC	18	90
T00210	SNORA65	CACTGCACCTGACCAGGTCTCTGTTGGCTGGTGCAATCCAGTGGTGAGCTGATAGTAAACCCCAGCTTAGGAAACAGGGTTGTTCTTCATGTGGATGACTCTGTGCCGAAAGCATGGGAA	16	90
T00008	SNORA66	GTGCAAACTCGATCACTAGCTCTGCGTGATGTGGCAGAAGCGAAGGGAACCAGGTTTGCAAAAGTAACTGTGGTGATGGAAATGTGTTAGCCTCAGACACTACTGAGGTGGTTCTTTCTATCCTAGTAC	24	78
T00174	SNORA66	TCGATCACTAGCTCTGCGTGATGTGGCAGAAGCGAAGGGAACCAGGTTTGCAAAAGTAACTGTGGTGATGGAAATGTGTTAGCCTCAGACACTACTGAGGTGGTTCTT	16	78
T00097	SNORA67	TCCAAGGTGATTCCCTCTCCAAGGGGACATCAGTGCCTCTCAGGAAAGTAGCAGCTTGGAATAGAATCTGGCATGCCTAAGGCCTTTGGGGAACTGGGATGCTTATTTCCTCTGCCTTCCTTGGCTGCCCACAT	23	94
T00242	SNORA67	TGATTCCCTCTCCAAGGGGACATCAGTGCCTCTCAGGAAAGTAGCAGCTTGGAATAGAATCTGGCATGCCTAAGGCCTTTGGGGAACTGGGATGCTTATTTCCTCTGCCTTCCTTGGCTGCCCA	16	94
T00109	SNORA68	ATTGCACCTAAACCCAAGAATCACTGTTTCTTATAGCGGTGGTTTAAACAGAGGTGCAAACAGCAAGCGGATCTTGTCGCCTTTGGGGGGCTGTGGCCGTGCCCCTCAAAGTGAATTTGGAGGTTCCACAACT	26	82
T00246	SNORA68	AACCCAAGAATCACTGTTTCTTATAGCGGTGGTTTAAACAGAGGTGCAAACAGCAAGCGGATCTTGTCGCCTTTGGGGGGCTGTGGCCGTGCCCCTCAAAGTGAATTTGGAG	16	82
T00124	SNORA69	GCAGGTTGCAATTACAGTGCTTCATTTTGTGGAAGTACTGCCATTATCCTGCTGAAAGAAAAGCCGTGTTAATCATTTTTGATTTTGCCTTTATGAGGGTAAAATCATGACAGATTGACATGGACAATT	23	79
T00252	SNORA69	GCAATTACAGTGCTTCATTTTGTGGAAGTACTGCCATTATCCTGCTGAAAGAAAAGCCGTGTTAATCATTTTTGATTTTGCCTTTATGAGGGTAAAATCATGACAGATT	16	79
T00125	SNORA70	CAGCCAATTAAGCCGACTGAGTTCCTTTCCTCATGGGGACCCAGTGTGCGATGGCTGCACACAGCAGCTTCCTTGGTAGTGTACGCAGCCTGTTGGTTGTATGGGTTGCTCTAAGGGACCTTGGAGA	22	84
T00253	SNORA70	ATTAAGCCGACTGAGTTCCTTTCCTCATGGGGACCCAGTGTGCGATGGCTGCACACAGCAGCTTCCTTGGTAGTGTACGCAGCCTGTTGGTTGTATGGGTTGCTCTAAGGGACC	16	84
T00016	SNORA70B	TGCAGCCAATTAAGCTGACTGAATTCCTTTCCTTATGGGGGTCCAGTGTGCAATGGCTGTAAACAGCAGCTTCCTTGGTAGTGTATGCGGCCTGTTTGTTGTATAGGTTGCTCTAAGGGACCTTGGAGA	24	84
T00180	SNORA70B	ATTAAGCTGACTGAATTCCTTTCCTTATGGGGGTCCAGTGTGCAATGGCTGTAAACAGCAGCTTCCTTGGTAGTGTATGCGGCCTGTTTGTTGTATAGGTTGCTCTAAGGGACC	16	84
T00055	SNORA70C	TCTGCAGCCAATTAAGCCAACTGGGTTCCTTTCCTCATGGGGGCCCATTGTGCAATGGCTGCAAACAGCAGCTTTCTTGGTAGTGTATGCAGCCTGTTTGTTGTATGGGTTGCTTTAAGGGACCATGGAAACAGGC	22	92
T00209	SNORA70C	GCCAATTAAGCCAACTGGGTTCCTTTCCTCATGGGGGCCCATTGTGCAATGGCTGCAAACAGCAGCTTTCTTGGTAGTGTATGCAGCCTGTTTGTTGTATGGGTTGCTTTAAGGGACCATGG	16	92
T00094	SNORA70D	CTGCAGACAGTTAAGCCAACTGAGTTCCTTTCCTCAGGGAGGCCCAGTGTACAATGGCTGCCCACAGCAGCTTCCTTGGTAGCGTACTCAGCCTGTTTCTTGTATGGGTTGCTCTAAGGGACCTTAG	24	82
T00240	SNORA70D	AGTTAAGCCAACTGAGTTCCTTTCCTCAGGGAGGCCCAGTGTACAATGGCTGCCCACAGCAGCTTCCTTGGTAGCGTACTCAGCCTGTTTCTTGTATGGGTTGCTCTAAGGG	16	82
T00066	SNORA70E	CTGCAACCAATTAAGCCGACCTAGTTCCTTTCCTCTTTGGGGCCTGGTGTTCAATAGCTGCAAACAGCAGCTTCCTTGGTAGTGTATGCAGCCTGTTTCTTGTATGGGTTGCTCTAAAGGACCTTGGAGACAGCC	24	92
T00218	SNORA70E	AATTAAGCCGACCTAGTTCCTTTCCTCTTTGGGGCCTGGTGTTCAATAGCTGCAAACAGCAGCTTCCTTGGTAGTGTATGCAGCCTGTTTCTTGTATGGGTTGCTCTAAAGGACCTTGGAGA	16	92
T00019	SNORA70F	GCAGTCAATTAAGTGTACTGAGTTCCTTTCCTTATGGGGGCCCAGTGTGCAATGGCTGCAAACAGCAGCTTCCTTGGTGGTGTATGCAGCCTGTTTCCTCTATAGGTTGCTCTAAGGGACCTTGATAATAGGC	29	80
T00183	SNORA70F	TGTACTGAGTTCCTTTCCTTATGGGGGCCCAGTGTGCAATGGCTGCAAACAGCAGCTTCCTTGGTGGTGTATGCAGCCTGTTTCCTCTATAGGTTGCTCTAAGGGACCTT	16	80
T00078	SNORA70G	CTGCAGCCTATTAAGCCAACTGAGTTCCTTTCCTCATGGGGGGGCCCAGTGTGCAATGGCTGCAAACAGCAGCTTCCTTGGTAGTGTATGCAGCCTGTGTGTTGTATTGTATGGGTTGCTCTAAGGGACCCTGGAGACAGT	24	97
T00226	SNORA70G	TATTAAGCCAACTGAGTTCCTTTCCTCATGGGGGGGCCCAGTGTGCAATGGCTGCAAACAGCAGCTTCCTTGGTAGTGTATGCAGCCTGTGTGTTGTATTGTATGGGTTGCTCTAAGGGACCCTGGA	16	97
T00114	SNORA71A	CTCCTGCATCCGAAAGTGATCATAGGCTGCCTGTGCCTAGGTCATTGATAGTGCAGGGAGAGGAACGCTGAAAGAGGTTGTCCCCGTGTTTGGAGGGTCCACCCTATCCCATCCGAACCCTGAAGCTTTCACACAACT	25	91
T00249	SNORA71A	CCGAAAGTGATCATAGGCTGCCTGTGCCTAGGTCATTGATAGTGCAGGGAGAGGAACGCTGAAAGAGGTTGTCCCCGTGTTTGGAGGGTCCACCCTATCCCATCCGAACCCTGAAGCTTTC	16	91
T00113	SNORA71B	CCTGTATTCGAAAGTGATCGTGGGCTGCCTTTGCCCTGGTCATTGATAGTGCAGGGAGAGGAATCAATGAAAGCGCTTCCCCGTGTTTGAAGGGTCCACTCCTATCCCTTCCAAACTCTGGAGCTTTCGTACATG	25	87
T00248	SNORA71B	GAAAGTGATCGTGGGCTGCCTTTGCCCTGGTCATTGATAGTGCAGGGAGAGGAATCAATGAAAGCGCTTCCCCGTGTTTGAAGGGTCCACTCCTATCCCTTCCAAACTCTGGAGCTT	16	87
T00115	SNORA71C	CCCCTGCATTCGAAAGTGATCATGAGCTGCCCGTGCCCTGGTCATTGGTAGTGCAGGGAGAGGAACTGCCGAGAGCACTTCCCCGTGTTTGGAGGGTCCACTCCTGTCTCTTCCAAACCCTGGAGCTTTC	24	85
T00250	SNORA71C	TTCGAAAGTGATCATGAGCTGCCCGTGCCCTGGTCATTGGTAGTGCAGGGAGAGGAACTGCCGAGAGCACTTCCCCGTGTTTGGAGGGTCCACTCCTGTCTCTTCCAAACCCTGG	16	85
T00116	SNORA71D	CACCTGTATTCGAAAGTGATCGTGGGCTGCCTGTGCCCTGGTCATTGATAGTGCAGGGAAAGAAATCGCGGAAAGTGCTTCCCCGTGTTTGGAGGGTCCGCTCCTGTCCCTTTCAAACTCTGGAGCTTTCTCACACCT	25	91
T00251	SNORA71D	TCGAAAGTGATCGTGGGCTGCCTGTGCCCTGGTCATTGATAGTGCAGGGAAAGAAATCGCGGAAAGTGCTTCCCCGTGTTTGGAGGGTCCGCTCCTGTCCCTTTCAAACTCTGGAGCTTTC	16	91
T00052	SNORA72	CTGCGAATATTCTCGCTGTTCTGATTTTGTAATAGTCAGGACAGGCTAAACATTCGCTATATTAAGACCATGCATGTGTCCCCAAACCTAGTTCTTTCCCTAGGTCTGGTTTTATAAATGCTGGTGATAAAC	24	63
T00003	SNORA73A	TCCAACGTGGATACACCCGGGAGGTCACTCTCCCCGGGCTCTGTCCAAGTGGCGTAGGGGAGCATAGGGCTCTGCCCCATGATGTACAAGTCCCTTTCCACAACGTTGGAAATAAAGCTGGGCCTCGTGTCTGCGCCTGCATATTCCTACAGCTTCCCAGAGTCCTGTCGACAATTACTGGGGAGACAAACCATGCAGGAAACAGCC	92	83
T00038	SNORA74A	GGTTGTCAGCTATCCAGGCTCATGTGGTGCCTGTGATGGTGTTACACTGTTGGAAGAGCAAACACTGTCTTTATTGAGGTTTGGCTCCAAGCACTGTTTTGGTGTTGTAGCTGAGTACCTTTGGGCAGTGTTTTGCACCTCTGAGAGTG	21	106
T00198	SNORA74A	TCAGCTATCCAGGCTCATGTGGTGCCTGTGATGGTGTTACACTGTTGGAAGAGCAAACACTGTCTTTATTGAGGTTTGGCTCCAAGCACTGTTTTGGTGTTGTAGCTGAGTACCTTTGGGCAGTGTTTTGCACCTC	16	106
T00039	SNORA74B	GCTGGGAGAGGAATGTCTTGTCTTCATCCGGTTGCCTGCGCCACTGTTCTGGTGGCGTCTGGCACTGGTGCAAGACAGAGCTGTGCTTCCCCGAGAGTGTGCTAAGCATTCACTTTGGCTGCTTAGTTCTAGTCTGGGAGCAGACAGAG	22	105
T00199	SNORA74B	AGAGGAATGTCTTGTCTTCATCCGGTTGCCTGCGCCACTGTTCTGGTGGCGTCTGGCACTGGTGCAAGACAGAGCTGTGCTTCCCCGAGAGTGTGCTAAGCATTCACTTTGGCTGCTTAGTTCTAGTCTGGGAGC	16	105
T00021	SNORA75	CATTGAGCTCCTTTCTGTCTATCAGTGGCAGTTTATGGATTCGCACGAGAAGAAGAGAGAATTCACAGAACTAGCATTATTTTACCTTCTGTCTTTACAGAGGTATATTTAGCTGTATTGTGAGACATTC	27	72
T00185	SNORA75	TTTCTGTCTATCAGTGGCAGTTTATGGATTCGCACGAGAAGAAGAGAGAATTCACAGAACTAGCATTATTTTACCTTCTGTCTTTACAGAGGTATATTTAGC	16	72
T00012	SNORA77	GCAGACTCACTATGCACCTGACTGTACTTCCAGGCAGGTGCTTTTTCTGTCTGCCAGAGAAACATTCCAGGGTGCTGTGGCTGCCTCACCTATCCAGGGCGATGCAGCTCCCTGGGGACACAGGT	22	86
T00177	SNORA77	TCACTATGCACCTGACTGTACTTCCAGGCAGGTGCTTTTTCTGTCTGCCAGAGAAACATTCCAGGGTGCTGTGGCTGCCTCACCTATCCAGGGCGATGCAGCTCCCTGGGGACACA	16	86
T00091	SNORA78	GTTGGTTGAAAATCGCCCCCGGCTTTGGCCGTGGCCGCGGGTGAGATTCGGCGCCCAGAGCCCCCGGGGGCCTCAGCTCACCGCGCGCTGCCCCATGTGCGGCGGTGAAACCCAGGCCCCGACAGGC	27	66
T00083	SNORA79	TGATGACTGTTCTTCCTGTTGCCTTCAGACCTGGCATTAGGATTTTAGGTCATCATAAATTAAAATTTGATTTTCTTCACTCAGAGAATATTAGGATAATGGAGTTATCTGTTCTCTGAAATTTGCGGAATCAAACATGT	24	91
T00231	SNORA79	GTTCTTCCTGTTGCCTTCAGACCTGGCATTAGGATTTTAGGTCATCATAAATTAAAATTTGATTTTCTTCACTCAGAGAATATTAGGATAATGGAGTTATCTGTTCTCTGAAATTTGCGGA	16	91
T00024	SNORA7A	GACCTCCTGGGATCGCATCTGGAGAGTGCCTAGTATTCTGCCAGCTTCGGAAAGGGAGGGAAAGCAAGCCTGGCAGAGGCACCCATTCCATTCCCAGCTTGCTCCGTAGCTGGCGATTGGAAGACACTCTGCGACAGTG	40	65
T00027	SNORA7B	ACCTCCTGGGATCGCATCTGGAGACTGCCTAGTATTCTGCCAGCTTCGGAAAGGGAGGGAAAGCAAGCCTGGCAGAGGCACCCATTCCATTCCCAGCTTGCTCCGTAGCTGGTGATTGGAAGACACTCTGCGAC	20	93
T00190	SNORA7B	CCTGGGATCGCATCTGGAGACTGCCTAGTATTCTGCCAGCTTCGGAAAGGGAGGGAAAGCAAGCCTGGCAGAGGCACCCATTCCATTCCCAGCTTGCTCCGTAGCTGGTGATTGGAAGACACT	16	93
T00070	SNORA8	CACTGCATGGTATCTGCACTCAGCAGTTTACACCTGCTAGGGTGTTCAAAGGTCAGTGCTATAGAAATTCAGTATCTGGCATCGTTGGTTTTCTTGGCTTTGTGCTTGTTAAACCTGGTATTTCTACT	23	78
T00221	SNORA8	TGGTATCTGCACTCAGCAGTTTACACCTGCTAGGGTGTTCAAAGGTCAGTGCTATAGAAATTCAGTATCTGGCATCGTTGGTTTTCTTGGCTTTGTGCTTGTTAAACC	16	78
T00015	SNORA80B	GCATGGGTTTGGATTTATGACAGGCCCGTCACCCTGGGCCTGTCATAGTACCCCATGCCAGAGCAAACTGTGTCCCCGAACCATTGCCTGGCCTCTGTGCCCGTAGGCTGCTGGCACTGAAGTGGGTTGCACAGTG	25	92
T00179	SNORA80B	TGGATTTATGACAGGCCCGTCACCCTGGGCCTGTCATAGTACCCCATGCCAGAGCAAACTGTGTCCCCGAACCATTGCCTGGCCTCTGTGCCCGTAGGCTGCTGGCACTGAAGTGGGTTGCA	16	92
T00030	SNORA81	GCTAAAATTGCAGACACTAGGACCATGTCTTGGTTTTTGCAATAATGCTAGCAGAGTACACACAAGAAGAAAAGTAACAGCACTAGATTGTAAAGACTGGGGTGGACCTCTTTCTTAATGTCCAATGTCCTTTGTCTTAAGATTTGGTGC	27	96
T00193	SNORA81	AGACACTAGGACCATGTCTTGGTTTTTGCAATAATGCTAGCAGAGTACACACAAGAAGAAAAGTAACAGCACTAGATTGTAAAGACTGGGGTGGACCTCTTTCTTAATGTCCAATGTCCTTTGTCT	16	96
T00054	SNORA84	TGGTTGCTGGATGCTGTTGTGCATGGACAGCTCTCCAGTGGATTCGATGGGCCATAGCAATCCTGTGATTTATGCATGGAGGCTGCTTCTCCTCAGCAGCTGCCATAGCCCGGTCGCTGGTACAT	21	88
T00208	SNORA84	GCTGGATGCTGTTGTGCATGGACAGCTCTCCAGTGGATTCGATGGGCCATAGCAATCCTGTGATTTATGCATGGAGGCTGCTTCTCCTCAGCAGCTGCCATAGCCCGGTCGCTGGTAC	16	88
T00044	SNORA9	AAGCCTCCAGCGTGCTTGGGTCTGCGGTGACCCTATGCATTCCTTCAGTGCTTGCTAGAACAGTTTTGAAACGGTTTGAGGCCTTGCCCTGCTCCATCCAGAGCAAGGTTATAGAAATTTCAGACA	18	80
T00203	SNORA9	GCCTCCAGCGTGCTTGGGTCTGCGGTGACCCTATGCATTCCTTCAGTGCTTGCTAGAACAGTTTTGAAACGGTTTGAGGCCTTGCCCTGCTCCATCCAGAGCAAGGTTAT	16	80
T00096	SNORD10	GCTCTGTGATGGAGCCCATGCGTGTCATCTGAGCCTCTGGCTTCCCTGCCAGTGCAGCCCTGGCAGTGTCCTACTTCCCAGGGCTGTTGTCTGCCTGGCGGGAAGGTCCTGGGCAAAGGATCAGTCTTTGTACTCTGAGAGCAGACTA	28	78
T00099	SNORD118	ATCGTCAGGTGGGATAATCCTTACCTGTTCCTCCTCCGGAGGGCAGATTAGAACATGATGATTGGAGATGCATGAAACGTGATTAACGTCTCTGCGTAATCAGGACTTGCAACACCCTGATTGCTCCTGTCTGATT	29	67
T00064	SNORD15A	CTTCGATGAAGAGATGATGACGAGTCTGACTTGGGGATGTTCTCTTTGCCCAGGTGGCCTACTCTGTGCTGCGTTCTGTGGCACAGTTTAAAGAGCCCTGGTTGAAGTAATTTCCTAAAGATGACTTAGAGGCATTTGTCTGAGAAGG	26	97
T00216	SNORD15A	GAGATGATGACGAGTCTGACTTGGGGATGTTCTCTTTGCCCAGGTGGCCTACTCTGTGCTGCGTTCTGTGGCACAGTTTAAAGAGCCCTGGTTGAAGTAATTTCCTAAAGATGACTTAGAGGCATTT	16	97
T00065	SNORD15B	CTTCAGTGATGACACGATGACGAGTCAGAAAGGTCACGTCCTGCTCTTGGTCCTTGTCAGTGCCATGTTCTGTGGTGCTGTGCACGAGTTCCTTTGGCAGAAGTGTCCTATTTATTGATCGATTTAGAGGCATTTGTCTGA	24	90
T00217	SNORD15B	ATGACACGATGACGAGTCAGAAAGGTCACGTCCTGCTCTTGGTCCTTGTCAGTGCCATGTTCTGTGGTGCTGTGCACGAGTTCCTTTGGCAGAAGTGTCCTATTTATTGATCGATTTAGA	16	90
T00112	SNORD17	ATGATTCAGTTTATCCATTCGCTGAGTGCGCTGCACTGACCTTCTTCCAAGCCTCAGTTCCTGTTCTAGGAACTTGAGGCTATGTAGCCTGAAAATGCCCTGCAGTCTGCAGTGTTCTACTGTGAACTGCTTGTGTGTTGGCAGGCTACC	28	104
T00247	SNORD17	ATCCATTCGCTGAGTGCGCTGCACTGACCTTCTTCCAAGCCTCAGTTCCTGTTCTAGGAACTTGAGGCTATGTAGCCTGAAAATGCCCTGCAGTCTGCAGTGTTCTACTGTGAACTGCTTGTGTGTTGGCAGGC	16	104
T00063	SNORD22	TCCCAATGAAGAAACTTTCACATGTCTTACTCTCTGTCCTAGTCCCAGAGCCTGTAAAGGTGAACCCACTGGGACTGGCTGGGGGAGAAGAGGAAGATTTGTTCCAGAAGGAACTGTCTGAGGGAT	32	72
T00100	SNORD3A	AAGACTATACTTTCAGGGATCATTTCTATAGTGTGTTACTAGAGAAGTTTCTCTGAACGTGTAGAGCACCGAAAACCACGAGGAAGAGAGGTAGCGTTTTCTCCTGAGCGTGAAGCCGGCTTTCTGGCGTTGCTTGGCTGCAACTGCCGTCAGCCATTGATGATCGTTCTTCTCTCCGTATTGGGGAGTGAGAGGGAGAGAACGCGGTCTGAGTGGT	79	64
T00101	SNORD3C	AAGACTATACTTTCAGGGATCATTTCTATAGTGTGTTACTAGAGAAGTTTCTCTGAACGTGTAGAGCACCGAAAACCACGAGGAAGAGAGGTAGCGTTTTCTCCTGAACGTGAAGCCGGCTTTCTGGCGTTGCTTGGCTGCAACTGCCGTCAGCCATTGATGATCGTTCTTCTCTCCGTATTGGGGAGTGAGAGGGAGAGAACGCGGTCTGAGTGGT	79	72
T00018	SNORD94	GTGATGATTGGCGCAGGGGTACGGACCTCAGCTGAGTCATGGGAGCTGAATGTATGTGTTTCTCCTTTGTCCTGCATGTGGCAGGCTGATGGGGAGCACTTACATGAGACTGTTGCCTCAATCTG	19	81
T00182	SNORD94	ATGATTGGCGCAGGGGTACGGACCTCAGCTGAGTCATGGGAGCTGAATGTATGTGTTTCTCCTTTGTCCTGCATGTGGCAGGCTGATGGGGAGCACTTACATGAGACTGTT	16	81
T00061	SNORD97	TTGCCCGATGATTATAAAAAGACGCGTTATTAAGAGGACTTTATGCTGGAGTTCTTGACGTTTTTCTCTCTTTTCTATACTTCTTTTTCTTTCTTTGAATGTCCAGCGTCCTGTGAGCGAAGATTATGAGATATGAGGGCAA	34	66
Table S2. Information about the Ampliseq platform for snoRNAs and scaRNAs analysis. Below the sequences for the 212 amplicon sequences for 127 snoRNAs
